# Supplementary material for: Detailed Inspection of γ-ray, Fast and Thermal Neutrons Shielding Competence of Calcium Oxide or Strontium Oxide Comprising Bismuth Borate Glasses
Source: MDPI journal article supplement (doi:10.3390/ma14092265), 2021-04-27
Supplement: s1 [file s1]

Supplementary Materials

# Detailed Inspection of $\gamma$ -ray, Fast and Thermal Neutrons Shielding Competence of Calcium Oxide or Strontium Oxide Comprising Bismuth Borate Glasses

Gandham Lakshminarayana, Youssef Elmahroug, Ashok Kumar, Huseyin Ozan Tekin, Najeh Rekik, Mengge Dong, Dong-Eun Lee, Jonghun Yoon and Taejoon Park

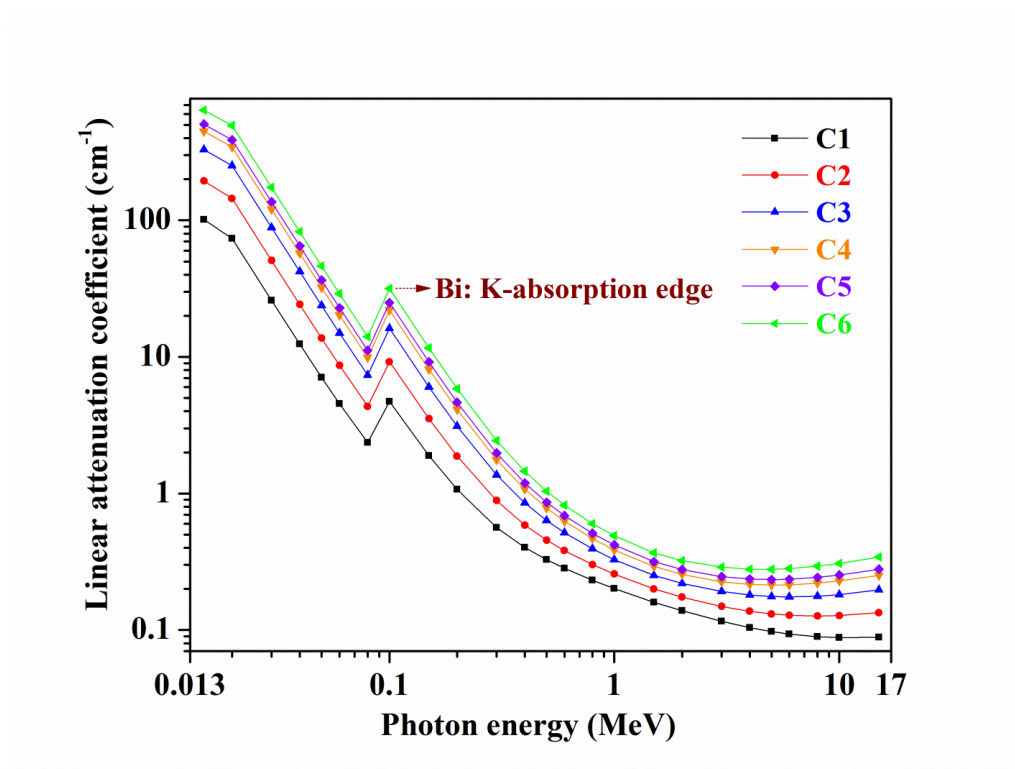

Figure S1. Variations of linear attenuation coefficient ( $\mu$ ,  $\text{cm}^{-1}$ ) with photon energy (MeV) for all C1–C6 glasses.

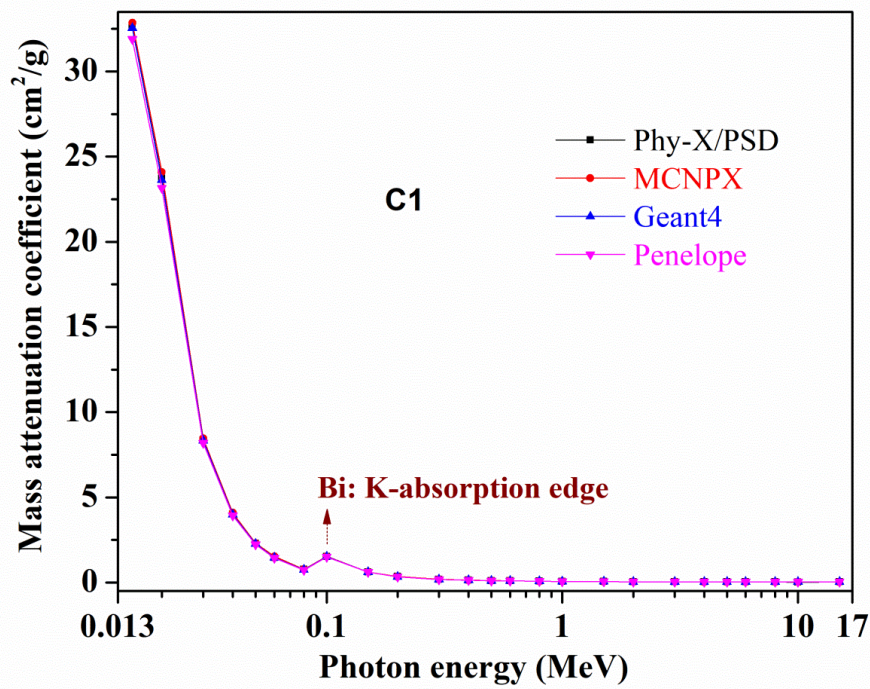

(a)

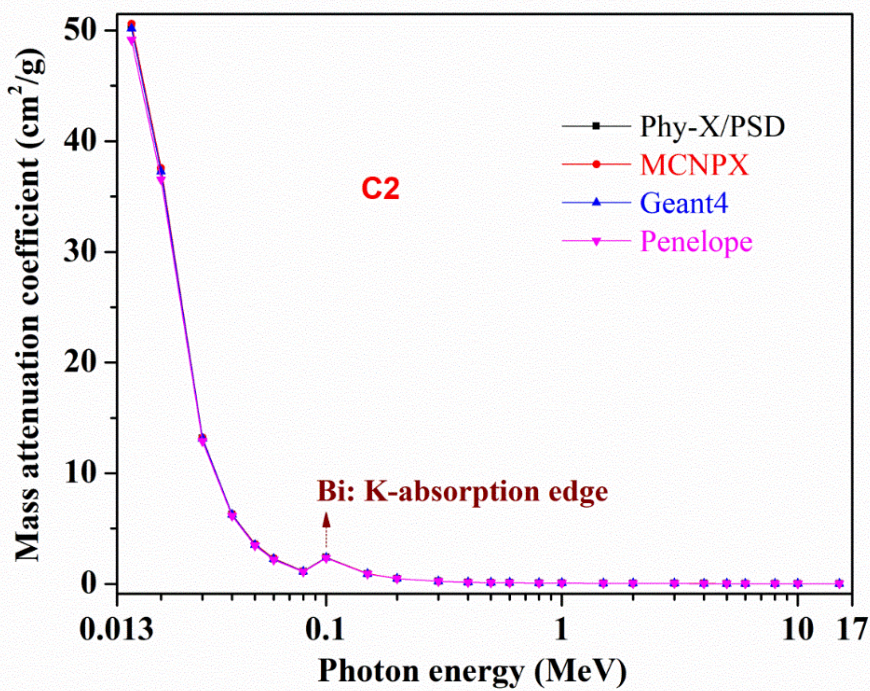

(b)



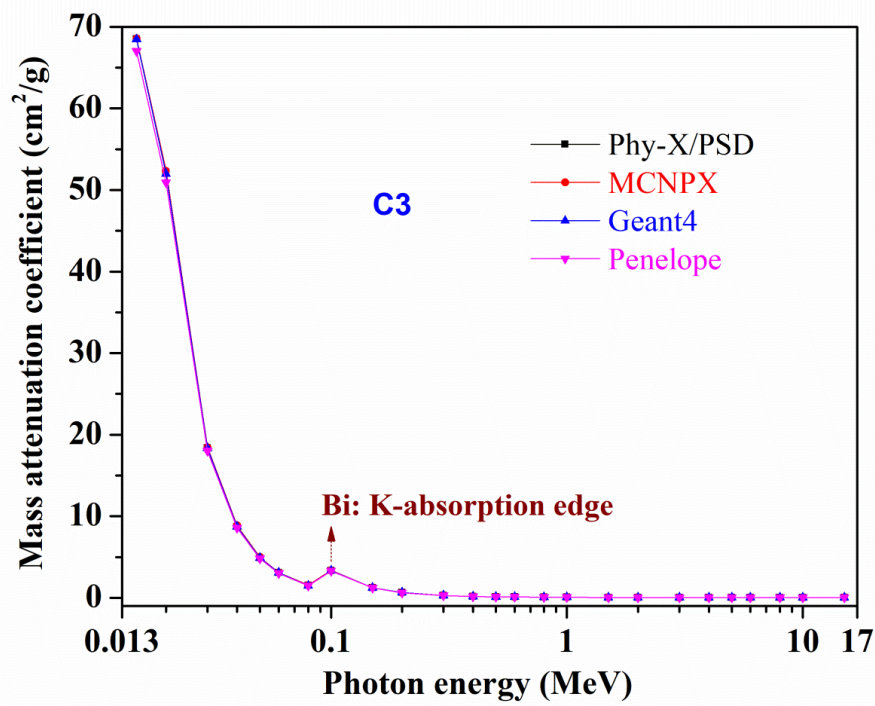

(c)

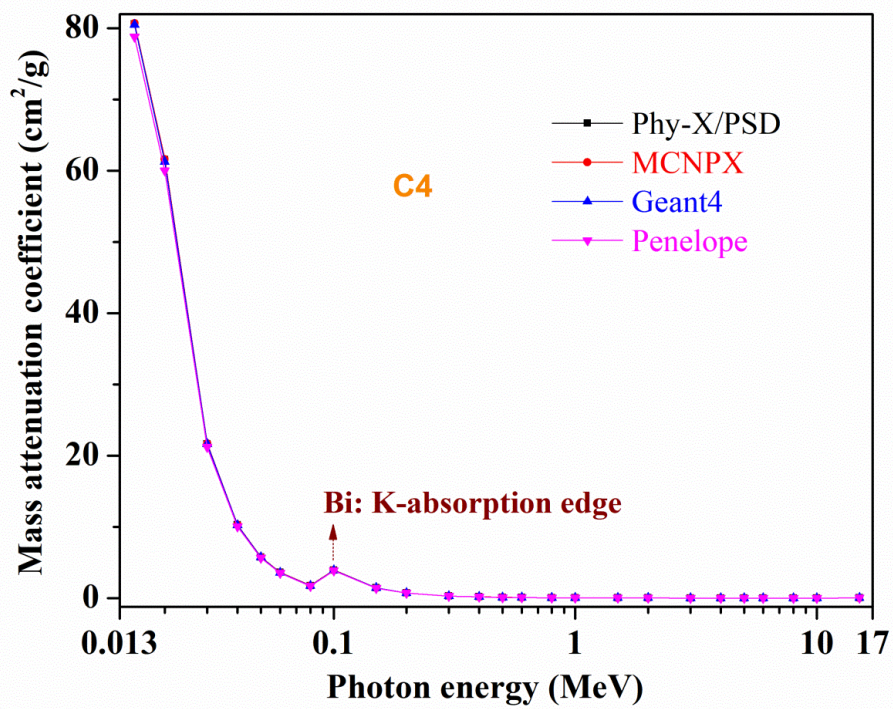

(d)

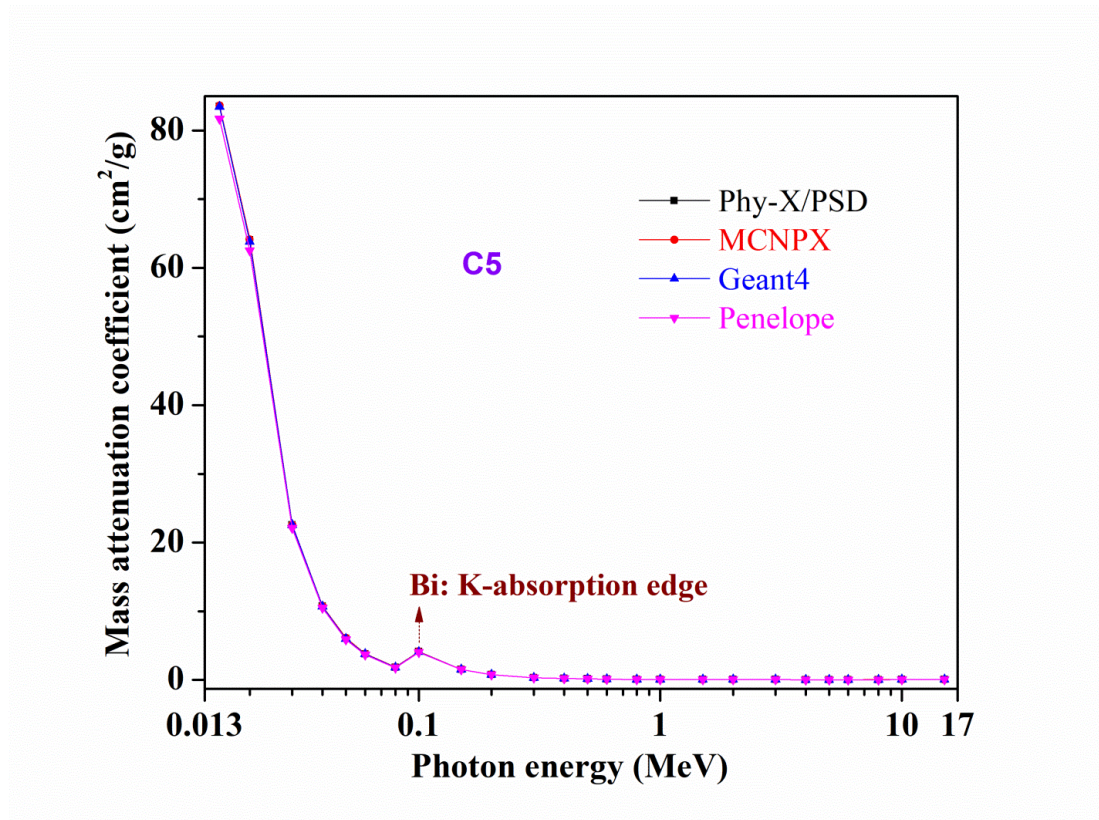

(e)

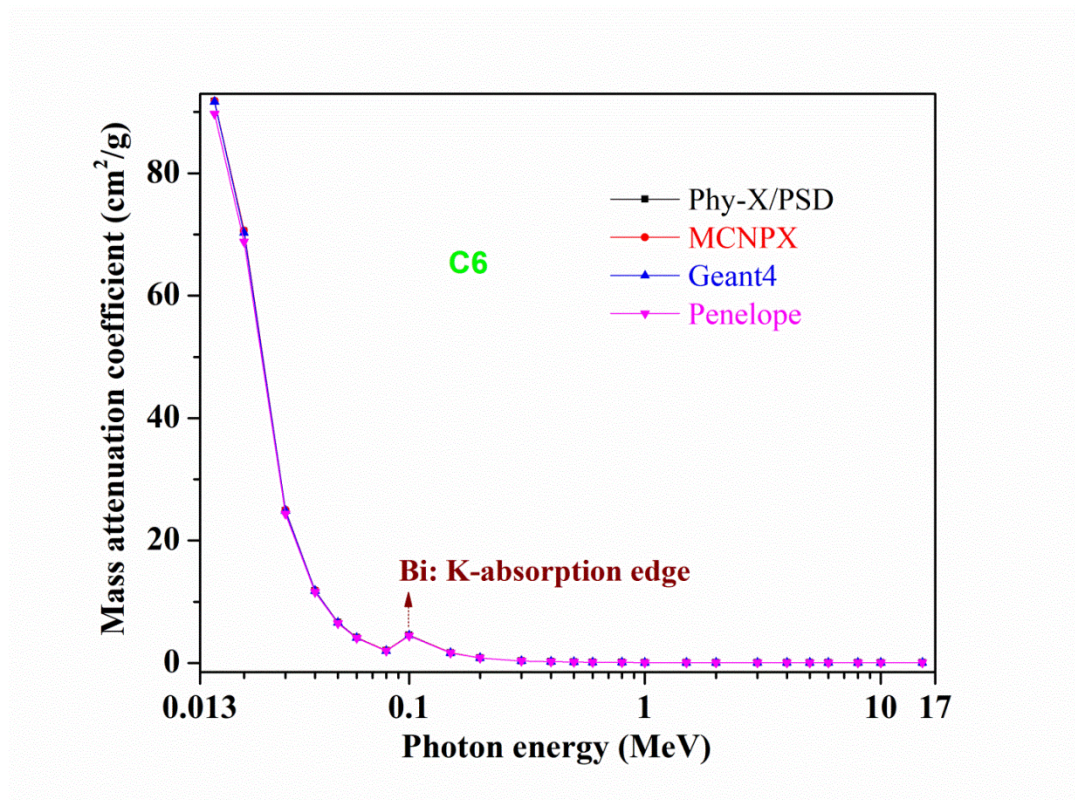

(f)



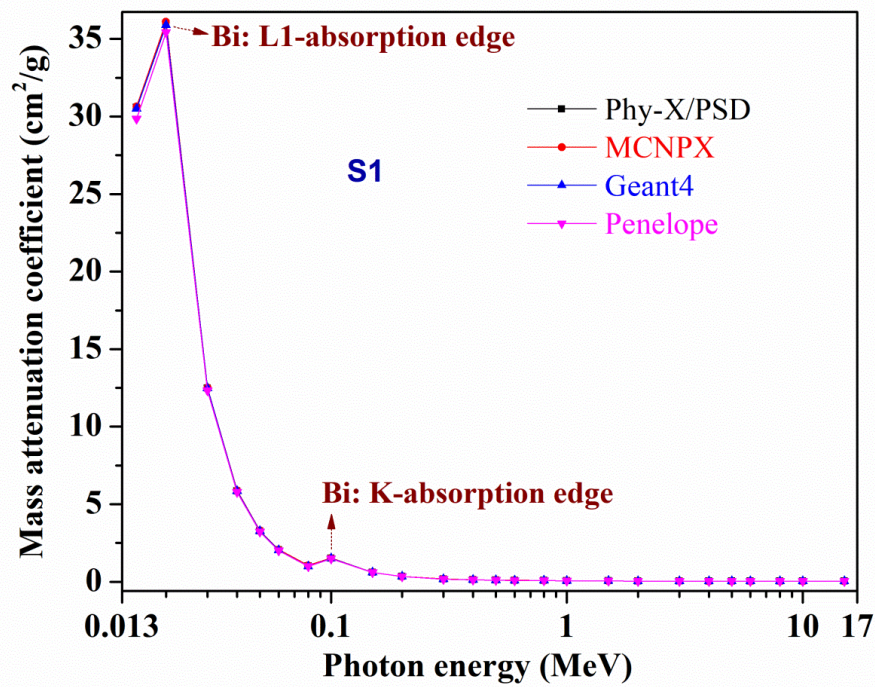

(g)

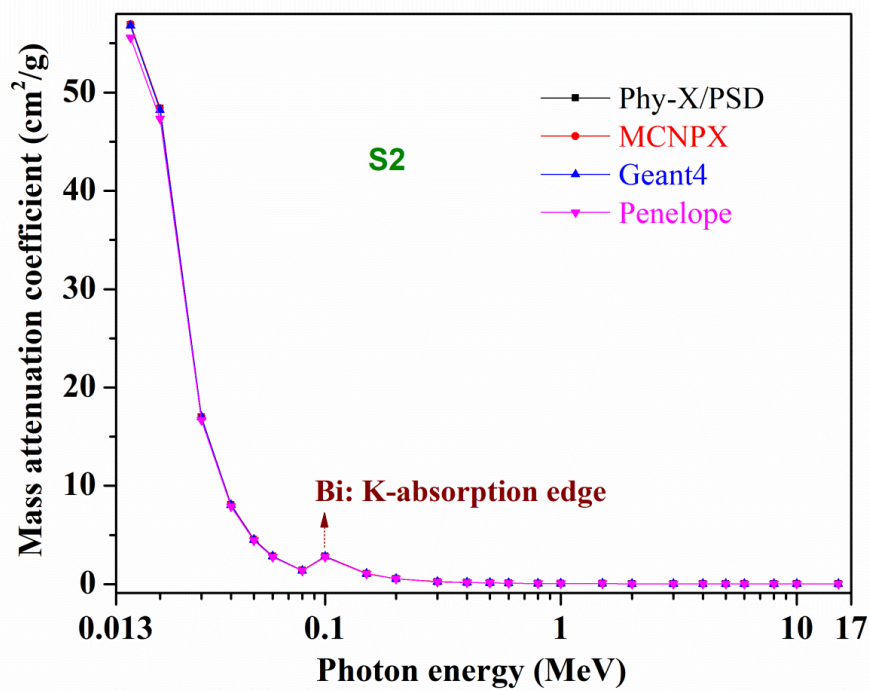

(h)

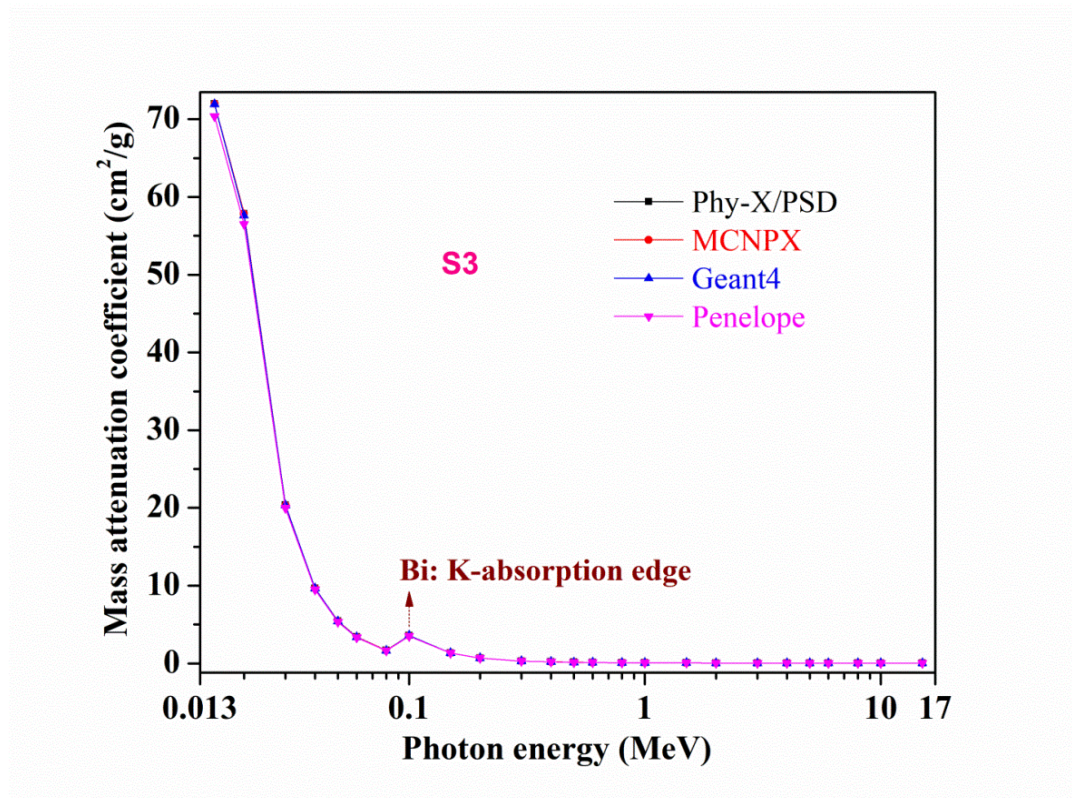

(i)

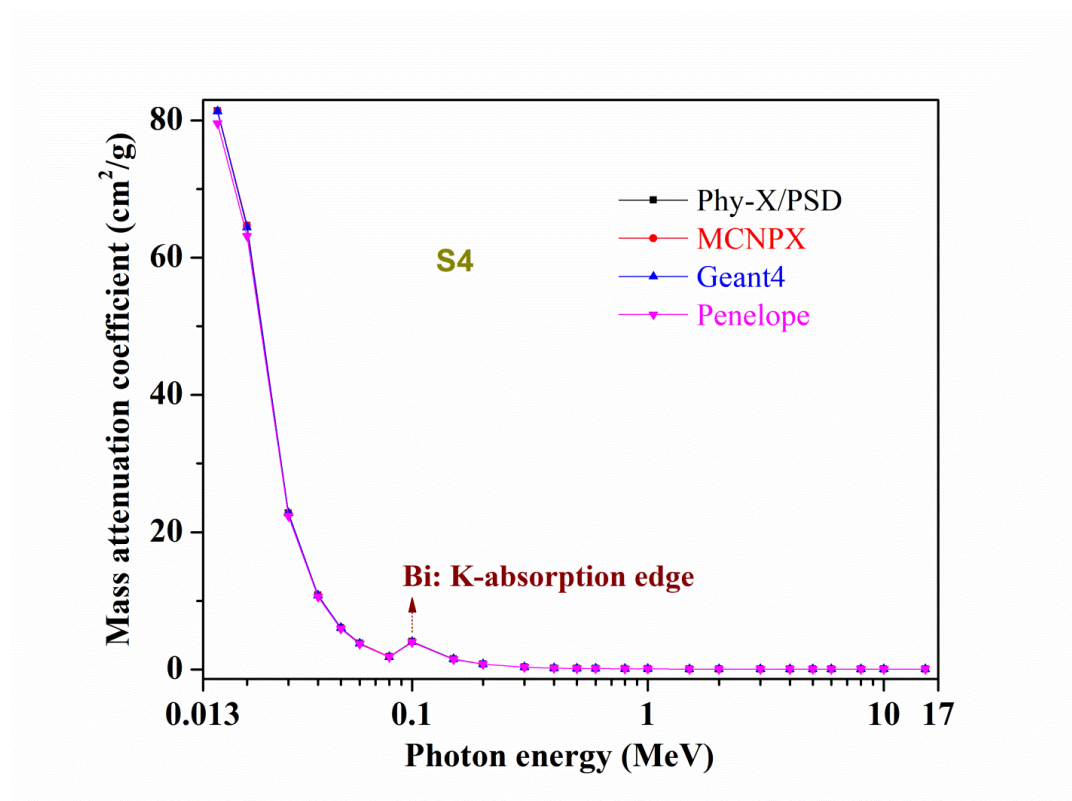

(j)



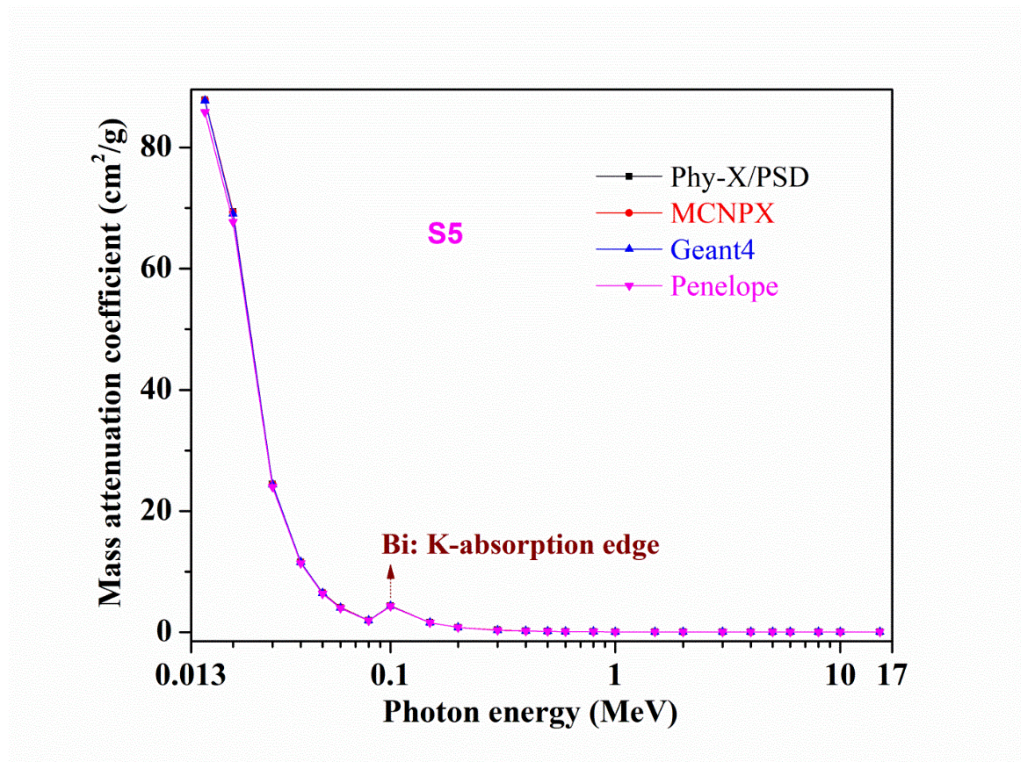

(k)

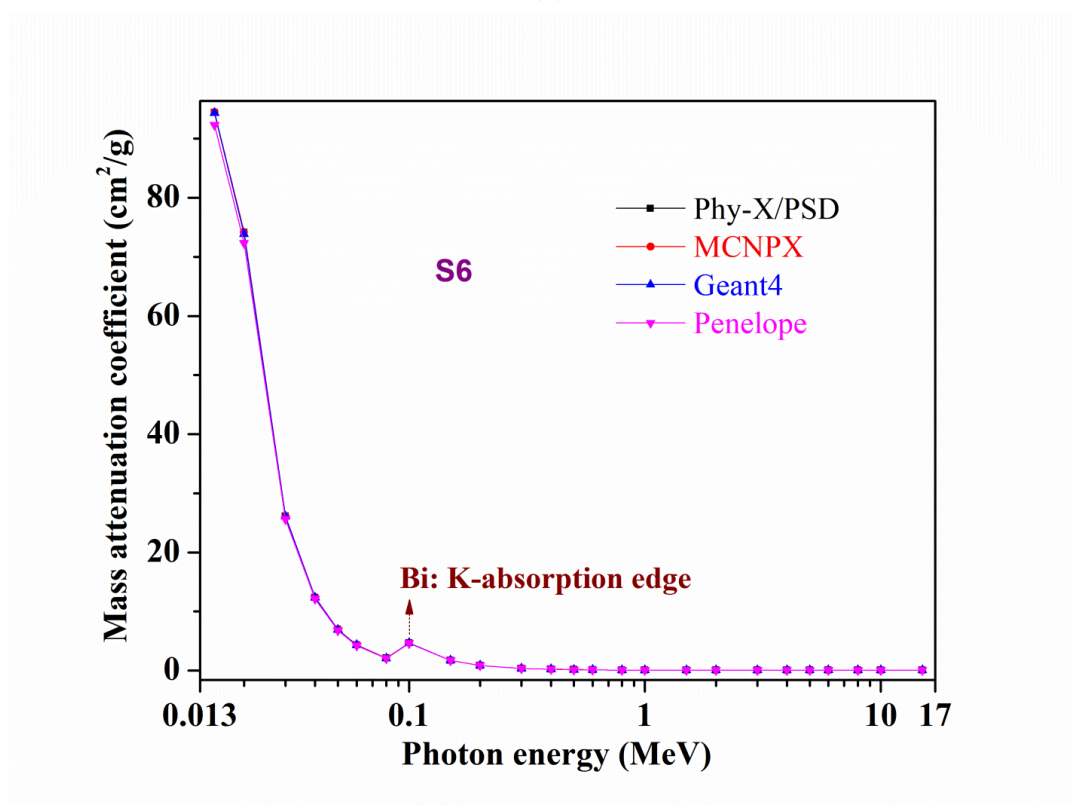

(l)

**Figure S2.** Comparison of Phy-X/PSD, MCNPX, Geant4, and Penelope code calculated mass attenuation coefficient versus photon energy for all (a-f) C1–C6 (g-l) S1–S6 glasses.

$Z_{eff}$  changes for all C1–C6 and S1–S6 samples are displayed in Figs. S3 (a) and (b), individually. With greater Z element (*i.e.* Bi) addition instead of B/Ca and B/Sr elements from C1 to C6 and S1 to S6 glasses,  $Z_{eff}$  values are enhanced and stick to an akin movement with incident photon energy. So the inclusion of the heavy metal oxide, Bi<sub>2</sub>O<sub>3</sub>, to the glass improves the interactions between ‘Bi’ atoms and photons, leading to a less number of  $\gamma$ -rays to escape through it. Moreover, in all chosen glasses, within 15 KeV–15 MeV energy range the S6 sample owns relatively higher  $Z_{eff}$  due to its larger content of ‘Bi’ (=80.6813 wt%), for instance, 80.17 (at 0.015 MeV energy) and 51.12 (at 15 MeV energy). The deduced  $Z_{eff}$  for all C1, C2, C3, C4, C5, and C6, and S1, S2, S3, S4, S5, and S6 glasses at 15 KeV energy is 51.18, 61.15, 71.78, 74.5, 76.81, and 79.08, and 56.69, 71.87, 76.27, 78.12, 79.2, and 80.17 accordingly. Initially,  $Z_{eff}$  values are greater at the lowest  $\gamma$ -ray energies, *i.e.* 20 KeV for all C1–C6 samples and 15 KeV for all S1–S6 glasses, and after, they rapidly reduce up to 0.4 MeV energy as PEA ( $\propto Z^{4-5}$ ) process command this range, apart from a sudden hike in  $Z_{eff}$  at 0.1 MeV energy (because of ‘Bi’ K-absorption edge). For all C1–C6 glasses, at 0.4 MeV energy, corresponding  $Z_{eff}$  quantities are 13.03, 18.43, 25.73, 33.62, 35.1, and 42.3, and at the same energy, these are 14.95, 21.78, 28.32, 34.61, 40.08, and 47.07, respectively, for all S1–S6 samples. Then, from 0.5 MeV up to 1.5 MeV energy, for all C1–C6 and S1–S6 glasses,  $Z_{eff}$  decrements and/or changes are minor, approaching the minimal at 1.5 MeV, due to CS ( $\propto Z$ ) action dominance. At 1.5 MeV energy, for all C1–C6 and S1–S6 samples obtained  $Z_{eff}$  quantities are 9.974, 12.64, 16.27, 21.13, 21.94, and 27.07, and 11.62, 14.32, 17.77, 21.71, 25.55, and 31.16, correspondingly. Thereafter, within 2–15 MeV  $\gamma$ -ray energy range, owing to PP ( $\propto Z^2$ ) mechanism supremacy,  $Z_{eff}$  is moderately increased for all C1–C6 and S1–S6 glasses. For instance, 10.04, 12.76, 16.47, 21.41, 22.24, and 27.44, and 14.67, 20.91, 29.2, 37.44, 39.21, and 46.54, respectively, are the  $Z_{eff}$  values for all C1–C6 samples at 2 and 15 MeV energies, while they are, at the same energies, 11.73, 14.49, 18, 22, 25.9, and 31.57, and 18.02, 25.27, 32.36, 38.92, 44.4, and 51.12, accordingly, for all S1–S6 glasses. Here, as it contains bigger  $Z_{eff}$  to more efficiently interact with incident photons, in all selected samples, S6 glass is most beneficial for  $\gamma$ -ray attenuation.

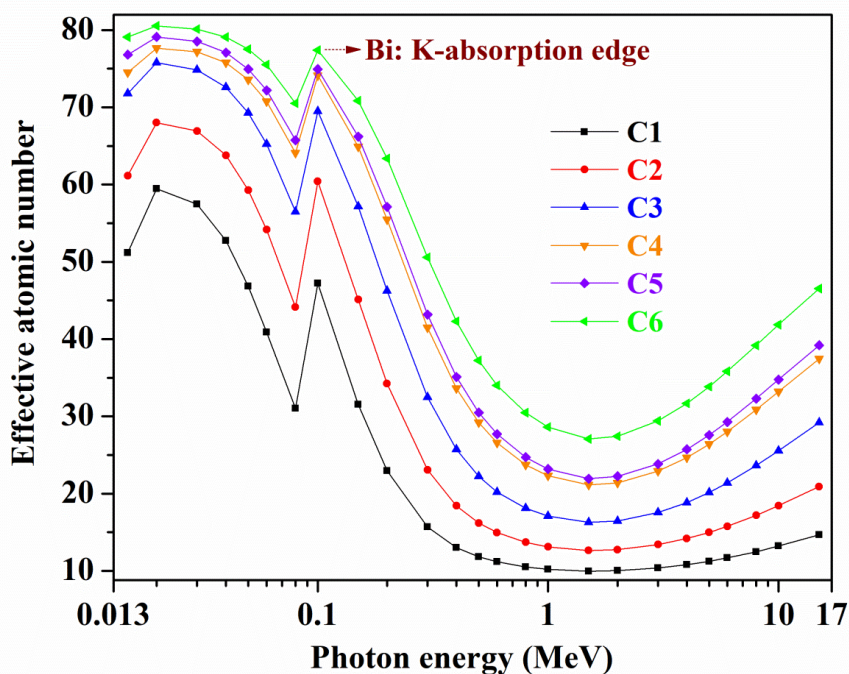

(a)



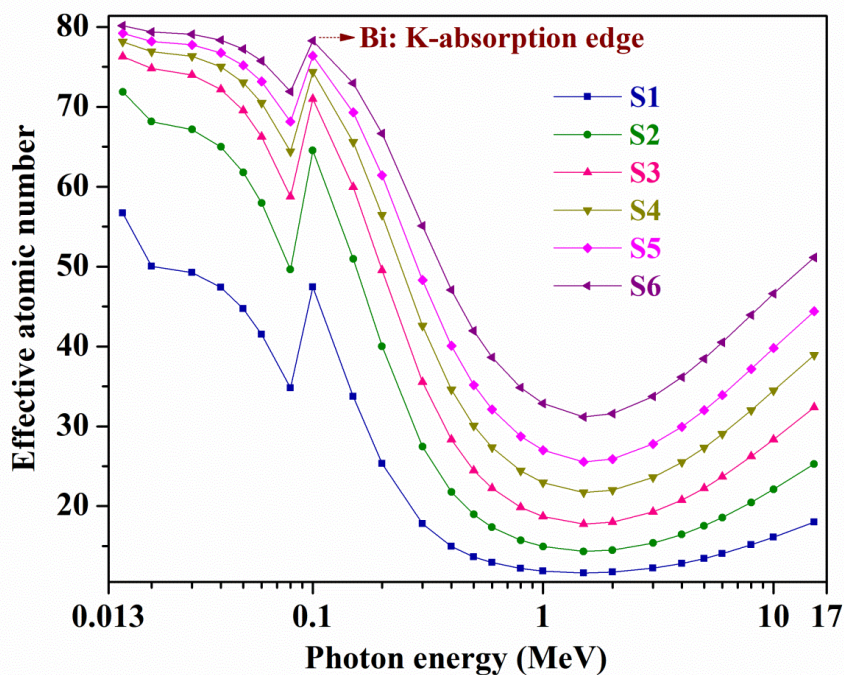

(b)

**Figure S3.** Variations of effective atomic number ( $Z_{eff}$ ) with photon energy (MeV) for all (a) C1–C6 (b) S1–S6 glasses.

Figs. S4 (a) and (b) presents  $N_{eff}$  deviations for all C1–C6 and S1–S6 glasses, respectively. For all studied glasses, derived  $N_{eff}$  quantities swing in an alike fashion to that of  $Z_{eff}$  fluctuations at all chosen photon energies and can be elucidated principally by respective PEA, CS, and PP processes preeminence at 0.015 KeV–0.4 MeV (lower), 0.5–1.5 MeV (intermediate), and 2–15 MeV (high) energy regions. For exploring a material photon attenuation capacity, evaluation of its'  $Z_{eff}$  and  $N_{eff}$  is essential and commonly, greater  $N_{eff}$  represents higher interactions between photons and electrons and energy transfer probabilities. Among all C1–C6 and S1–S6 glasses, sample C1 (holds 70 mol%  $B_2O_3$  and 46.4821 wt% 'O') has the largest  $N_{eff}$  at the lowest photon energies (0.015–0.05 MeV). For instance, at 0.05 MeV energy, from C1 to C6 glass, the computed  $N_{eff}$  values are  $13.94 \times 10^{23}$ ,  $13.92 \times 10^{23}$ ,  $12.56 \times 10^{23}$ ,  $10.17 \times 10^{23}$ ,  $9.953 \times 10^{23}$ , and  $8.235 \times 10^{23}$  electrons/g, accordingly, while at the same energy, from S1 to S6 sample, they are  $11.08 \times 10^{23}$ ,  $12.62 \times 10^{23}$ ,  $11.43 \times 10^{23}$ ,  $9.761 \times 10^{23}$ ,  $8.465 \times 10^{23}$ , and  $7.032 \times 10^{23}$  electrons/g, respectively. Further, among all S1–S6 glasses, sample S2 (contains 70 mol%  $B_2O_3$  and 32.1965 wt% 'O') has higher  $N_{eff}$  within 0.015–0.2 MeV energy range, for example, at 0.2 MeV energy,  $6.279 \times 10^{23}$ ,  $8.17 \times 10^{23}$ ,  $8.146 \times 10^{23}$ ,  $7.547 \times 10^{23}$ ,  $6.914 \times 10^{23}$ , and  $6.069 \times 10^{23}$  electrons/g, individually, are the  $N_{eff}$  quantities for S1 to S6 sample. Likewise, respective minimal  $N_{eff}$  values achieved for all C1–C6 and S1–S6 samples at 1.5 MeV energy are  $2.967 \times 10^{23}$ ,  $2.966 \times 10^{23}$ ,  $2.949 \times 10^{23}$ ,  $2.922 \times 10^{23}$ ,  $2.914 \times 10^{23}$ , and  $2.876 \times 10^{23}$  electrons/g, and  $2.881 \times 10^{23}$ ,  $2.924 \times 10^{23}$ ,  $2.922 \times 10^{23}$ ,  $2.901 \times 10^{23}$ ,  $2.877 \times 10^{23}$ , and  $2.837 \times 10^{23}$  electrons/g. Next, for C1 to C6 and S1 to S6 glasses, at 15 MeV photon energy, the obtained  $N_{eff}$  quantities are  $4.364 \times 10^{23}$ ,  $4.908 \times 10^{23}$ ,  $5.293 \times 10^{23}$ ,  $5.175 \times 10^{23}$ ,  $5.208 \times 10^{23}$ , and  $4.944 \times 10^{23}$  electrons/g, and  $4.466 \times 10^{23}$ ,  $5.16 \times 10^{23}$ ,  $5.322 \times 10^{23}$ ,  $5.203 \times 10^{23}$ ,  $4.999 \times 10^{23}$ , and  $4.655 \times 10^{23}$  electrons/g, accordingly. Overall, within selected  $\gamma$ -ray energy range,  $N_{eff}$  has varied at  $15.22 \times 10^{23}$  –  $4.364 \times 10^{23}$  electrons/g and  $14.68 \times 10^{23}$  –  $5.16 \times 10^{23}$  electrons/g boundaries, for C1 and S2 samples, accordingly.

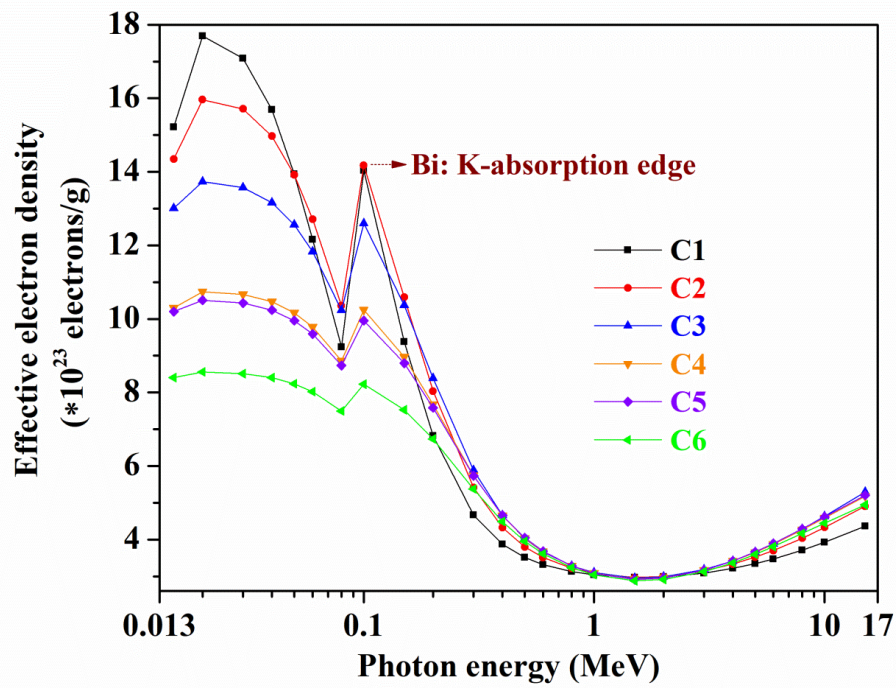

(a)

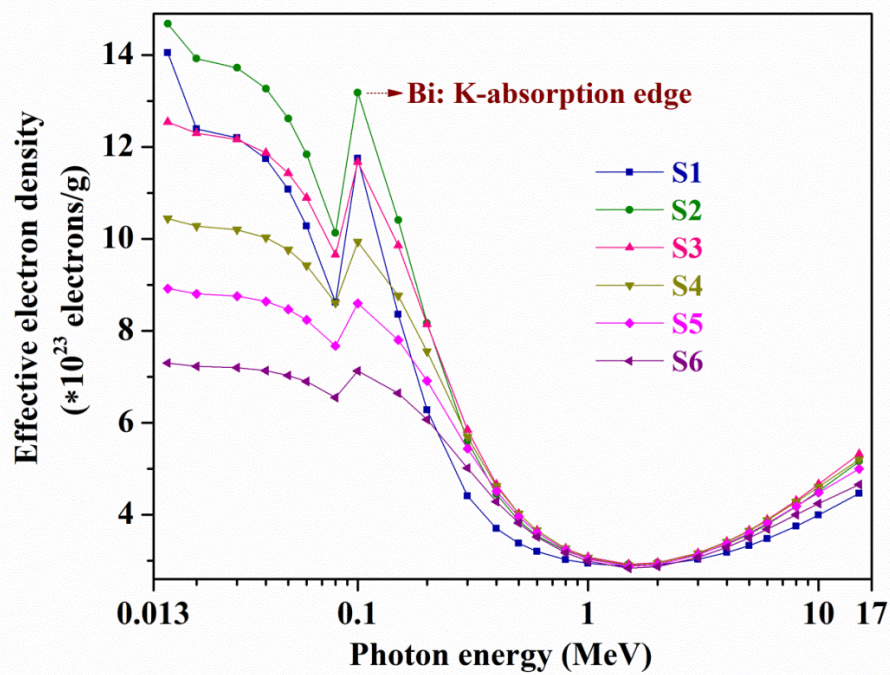

(b)

**Figure S4.** Variations of effective electron density ( $N_{eff}$ ) with photon energy (MeV) for all (a) C1–C6 (b) S1–S6 glasses.



Usually, shielding substances thickness (in cm) is figured out by assessing HVL, TVL, and MFP (banks on substance's chemical balance, photon energy, ' $\mu$ ', and  $\rho$ ) and here, the lesser the HVL, TVL, and MFP, the lower the thickness requirements for avoiding larger space occupations by them at the nuclear medicine and nuclear reactor facilities for preferable  $\gamma$ -ray shielding. Discrepancies in estimated HVL and TVL values for all C1–C6 and S1–S6 samples are depicted in Figs. S5 (a) and (b) and Figs. S6 (a) and (b), accordingly, and respective inset plots show expanded 0.029–0.16 MeV energy regions. For all examined glasses, at all considered photon energies, calculated HVL and TVL drifts are the same (see Figs. S5 and S6). Here, HVL and TVL decrease in the C6<C5<C4<C3<C2<C1 and S6<S5<S4<S3<S2<S1 orders, respectively. As one can see, for all C1–C6 and S1–S6 samples, at the 0.015–0.1 MeV energies, HVL and TVL quantities are minimal exhibiting fewer changes. At 0.015 and 0.1 MeV energies, HVL and TVL calculated from C1 to C6 glass are (0.007, 0.004, 0.002, 0.002, 0.001, and 0.001 cm, and 0.023, 0.012, 0.007, 0.005, 0.005, and 0.004 cm), and (0.147, 0.075, 0.043, 0.032, 0.028, and 0.022 cm, and 0.488, 0.25, 0.143, 0.105, 0.092, and 0.073 cm), respectively. Similarly, (0.006, 0.003, 0.002, 0.001, 0.001, and 0.001 cm, and 0.021, 0.009, 0.006, 0.005, 0.004, and 0.003 cm), and (0.129, 0.054, 0.038, 0.028, 0.024, and 0.02 cm, and 0.429, 0.18, 0.125, 0.095, 0.079, and 0.065 cm), accordingly, are HVL and TVL from S1 to S6 sample at 0.015 and 0.1 MeV energies. Next, with rising photon energy from 0.15 MeV, HVL and TVL of all C1–C6 and S1–S6 glasses steeply grow, attaining maximal at 10, 8, and 6 MeV for respective C1 (=7.889 cm and 26.21 cm), C2 (=5.479 cm and 18.2 cm), and C3 (=3.963 cm and 13.17 cm) glasses, and 5 MeV for C4 (=3.248 cm and 10.79 cm), C5 (=2.962 cm and 9.841 cm), and C6 (=2.49 cm and 8.271 cm) samples, and accordingly, at 10 MeV energy for S1 (=6.453 cm and 21.43 cm) glass, 6 MeV for S2 (=4.422 cm and 14.69 cm) and S3 (=3.636 cm and 12.08 cm) samples, 5 MeV for S4 (=2.991 cm and 9.935 cm) and S5 (=2.638 cm and 8.764 cm) glasses, and 4 MeV for S6 glass (=2.27 cm and 7.542 cm). Then, from energies above 10 MeV for C1 and S1 glasses, beyond 8 MeV for C2 sample, after 6 MeV for C3, S2, and S3 glasses, above 5 MeV for C4, C5, C6, S4, and S5 samples, and after 4 MeV for S6 glass, HVL and TVL are slightly depleted. For instance, at 15 MeV energy, corresponding HVL and TVL for all C1–C6 and S1–S6 samples are (7.835, 5.18, 3.517, 2.755, 2.485, and 2.026 cm, and 26.03, 17.21, 11.68, 9.153, 8.254, and 6.731 cm), and (6.256, 4.033, 3.159, 2.509, 2.163, and 1.819 cm, and 20.78, 13.4, 10.49, 8.335, 7.187, and 6.044 cm). Correspondingly as narrated for  $\mu$ ,  $\mu/\rho$ ,  $Z_{eff}$ , and  $N_{eff}$  deviations at distinctive energy regions for all C1–C6 and S1–S6 glasses, both HVL and TVL alterations also can be explicated on account of separate PEA, CS, and PP events ascendancy. Among all selected C1–C6 and S1–S6 samples, relatively, glass S6 has the smaller HVL and TVL at all inspected energies as it owns proportionally bigger ' $\mu$ ' and ' $\rho$ ' (=7.59 g/cm<sup>3</sup>), implying its' better photon shielding effectiveness in all samples (see Figs. S5 and S6).

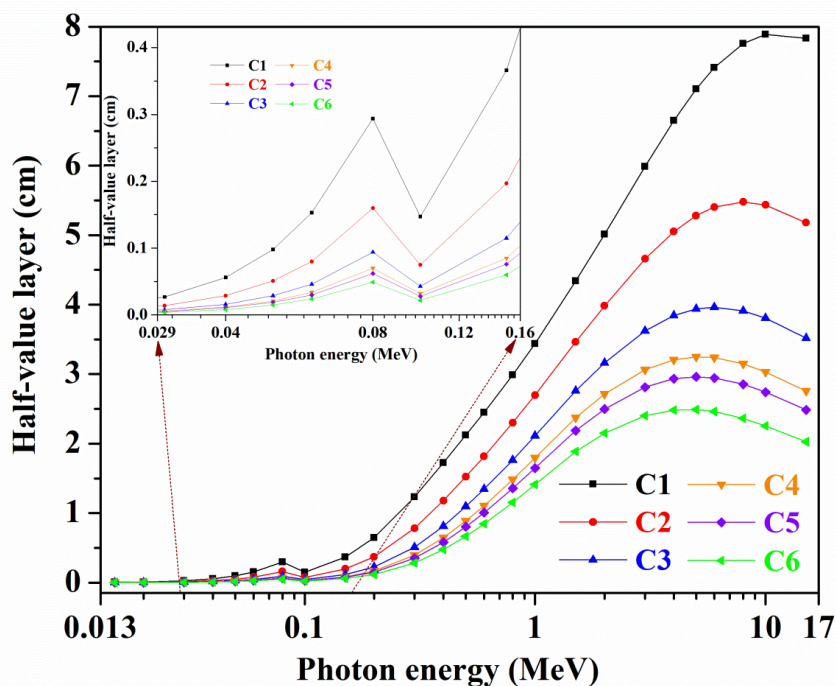

(a)

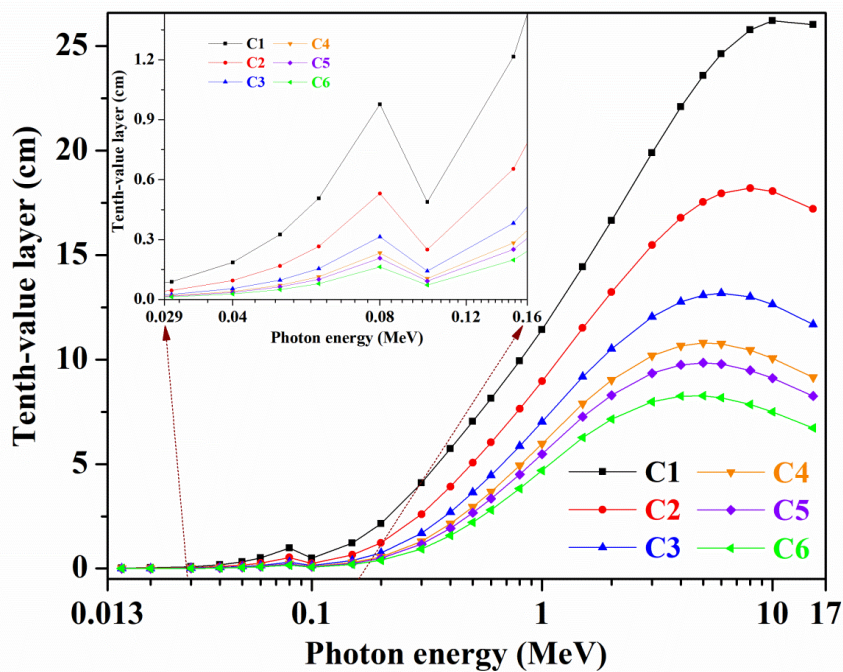

(b)

**Figure S5.** Variations of (a) half-value layer (HVL) (inset, within the 0.029–0.16 MeV photon energy range) and (b) tenth-value layer (TVL) (inset, within the range of 0.029–0.16 MeV photon energy) with photon energy for all C1–C6 glasses.



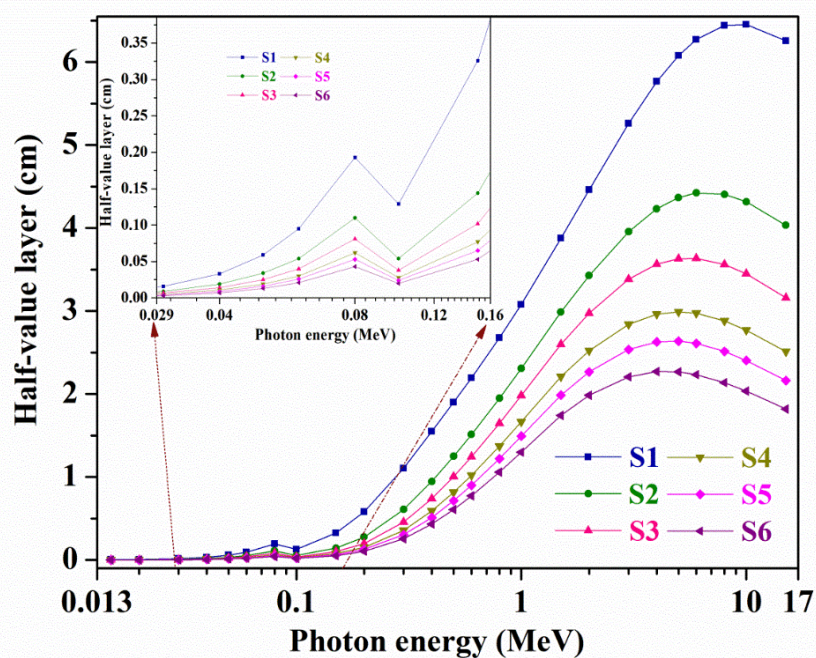

(a)

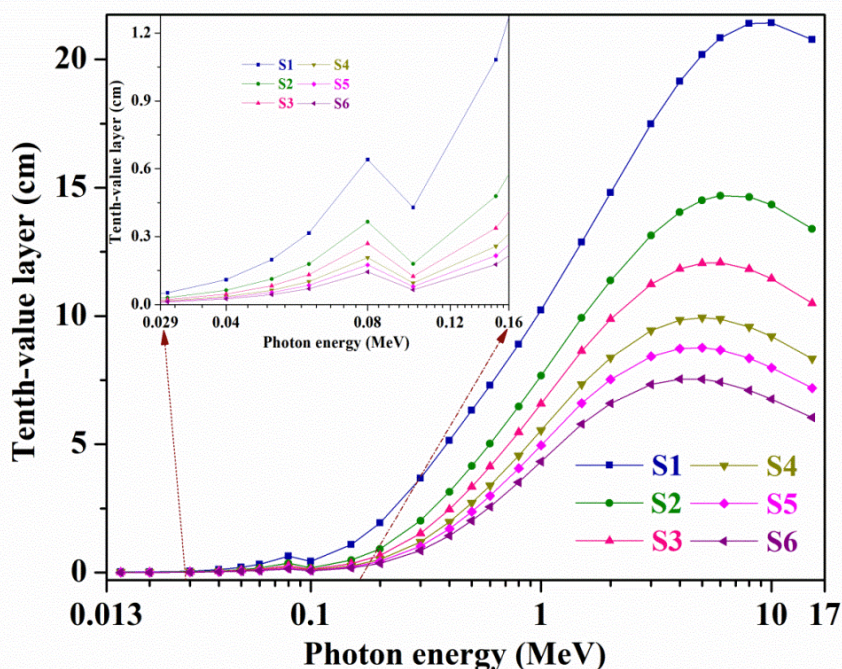

(b)

**Figure S6.** Variations of (a) half-value layer (HVL) (inset, within the 0.029–0.16 MeV photon energy range) and (b) tenth-value layer (TVL) (inset, within the range of 0.029–0.16 MeV photon energy) with photon energy for all S1–S6 glasses.



Figs. S7 (a) and (b) exhibits the alterations in deduced MFP values for all respective C1–C6 and S1–S6 glasses, whereas corresponding inset plots display 0.029–0.16 MeV energy zoom-in regions. Correspondingly to the HVL and TVL, for all selected glasses, derived MFP quantities also emulate a similar direction with photon energy. On behalf of  $\text{B}_2\text{O}_3/\text{CaO}$  or  $\text{B}_2\text{O}_3/\text{SrO}$ , the increasing insertion of  $\text{Bi}_2\text{O}_3$  content from C1 to C6 and S1 to S6 glasses steadily lowered the MFP at any discrete  $\gamma$ -ray energy as sample's ' $\rho$ ' enhances (see Tables 1 and 2 in the main text). For all C1–C6 and S1–S6 glasses, at inferior photon energies (*i.e.* 0.015–0.1 MeV range), calculated MFP ( $=1/\mu$ ) values are minimal with small variations. At 15 KeV and 0.1 MeV energies, (0.01, 0.005, 0.003, 0.002, 0.002, and 0.002 cm) and (0.212, 0.109, 0.062, 0.045, 0.04, and 0.032 cm), and (0.009, 0.004, 0.003, 0.002, 0.002, and 0.001 cm) and (0.186, 0.078, 0.054, 0.041, 0.034, and 0.028 cm) are the respective obtained MFP quantities for all C1, C2, C3, C4, C5, and C6, and S1, S2, S3, S4, S5, and S6 glasses. Then, considerable accruals in MFP beyond 0.15 MeV energy up to 10 MeV for C1 ( $=11.38$  cm), S1 ( $=9.309$  cm) samples, 8 MeV for C2 glass ( $=7.904$  cm), 6 MeV for C3 ( $=5.718$  cm), S2 ( $=6.379$  cm), and S3 ( $=5.246$  cm) glasses, 5 MeV for C4 ( $=4.686$  cm), C5 ( $=4.274$  cm), C6 ( $=3.592$  cm), S4 ( $=4.315$  cm), and S5 ( $=3.806$  cm) samples, and 4 MeV for S6 glass ( $=3.276$  cm) are observed. Later, after 10 MeV for C1 and S1 glasses, beyond 8 MeV for C2 sample, above 6 MeV for C3, S2, and S3 samples, beyond 5 MeV for C4, C5, C6, S4, and S5 glasses, after 4 MeV for S6 sample up to 15 MeV energy, MFP quantities are slowly declined. At 15 MeV energy, derived MFP for corresponding all C1–C6 and S1–S6 samples are (11.3, 7.473, 5.074, 3.975, 3.585, and 2.923 cm) and (9.026, 5.818, 4.558, 3.62, 3.121, and 2.625 cm). Within 15 KeV–15 MeV energy range, for MFP changes also, at typical  $\gamma$ -ray energy ranges (*i.e.* low, medium, and high), as made clear in cases of  $\mu$ ,  $\mu/\rho$ ,  $Z_{\text{eff}}$ ,  $N_{\text{eff}}$ , and HVL and TVL variations for all C1–C6 and S1–S6 samples, appropriate PEA, CS, and PP mechanisms play pivotal roles. In all studied glasses, correlatively, sample S6 owns the minimal MFP (larger ' $\rho$ ', bigger  $\mu/\rho$ , and lesser HVL and TVL), signifying its' better potential for  $\gamma$ -ray shielding in all samples.

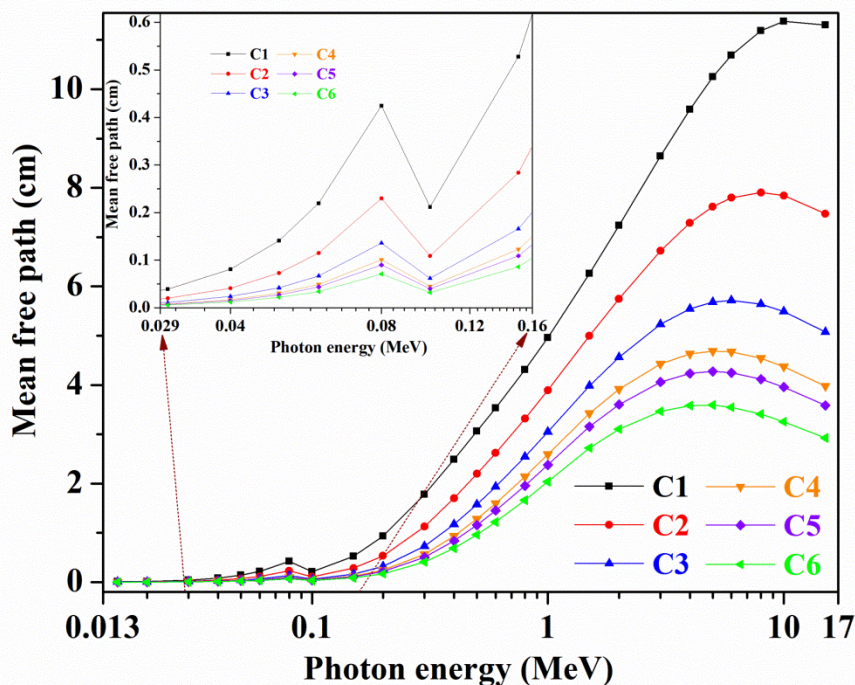

(a)



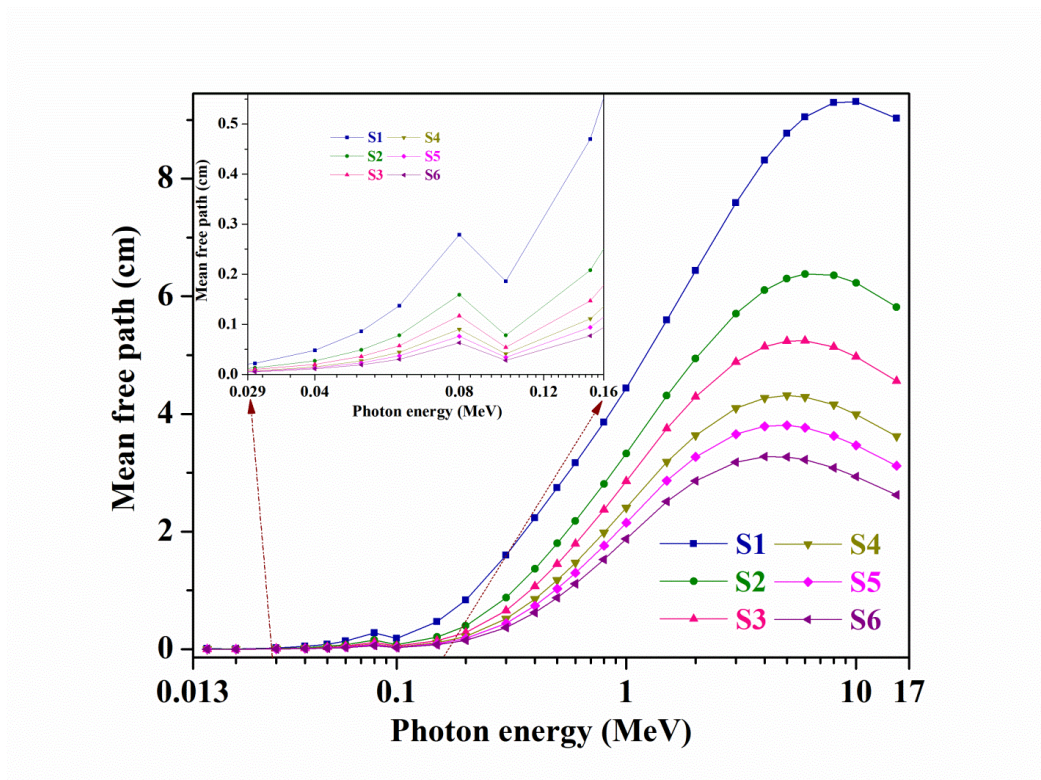

(b)

**Figure S7.** Variations of mean free path (MFP) with photon energy (MeV) for all (a) C1–C6 (inset, within the range of 0.029–0.16 MeV photon energy) and (b) S1–S6 (inset, within the 0.029–0.16 MeV photon energy range) glasses.

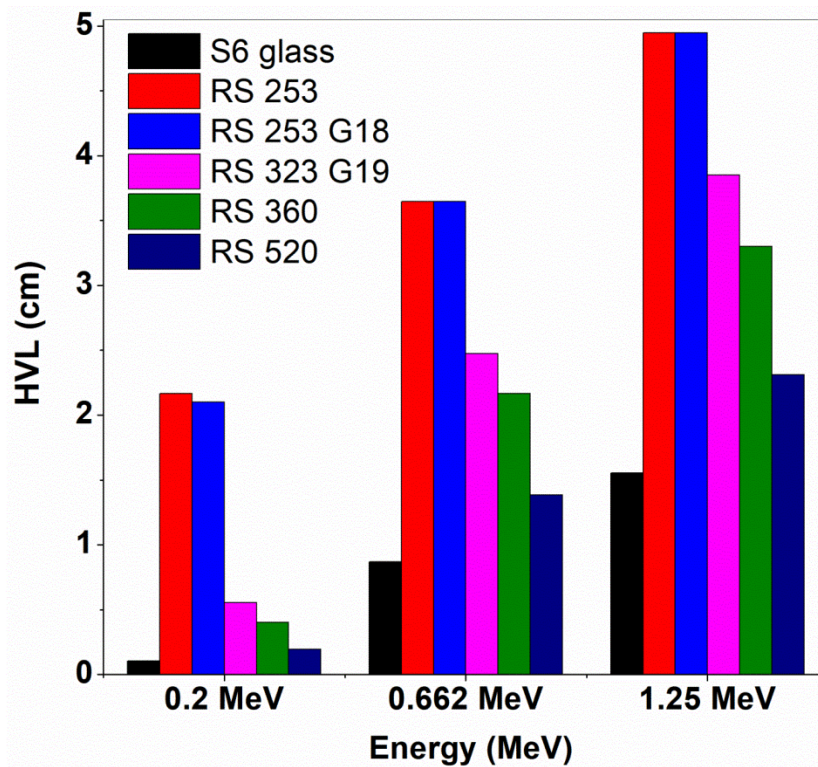

**Figure S8.** Comparison of HVL of the glass ‘S6’ with some commercial glasses.



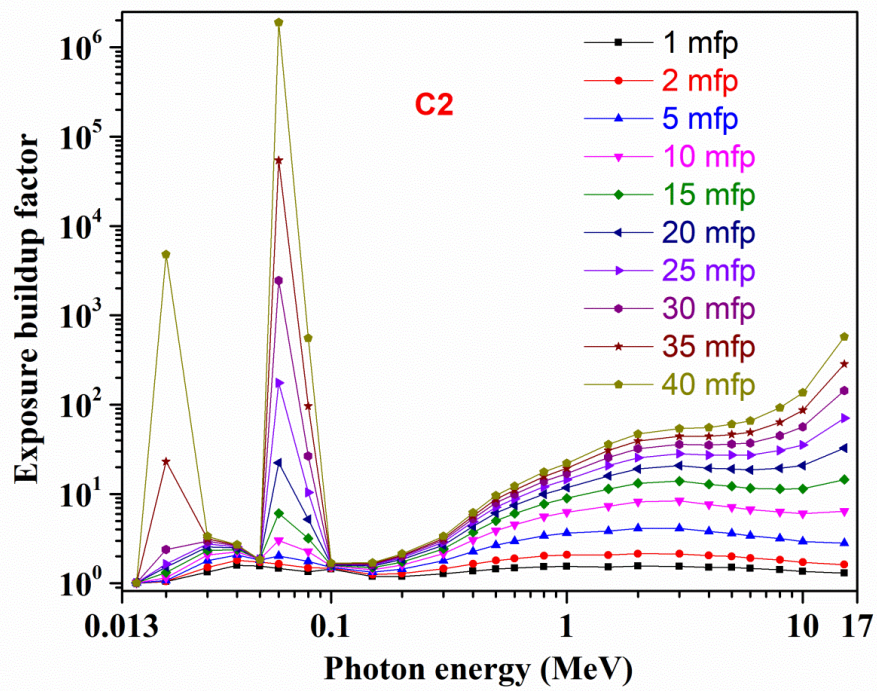

(a)

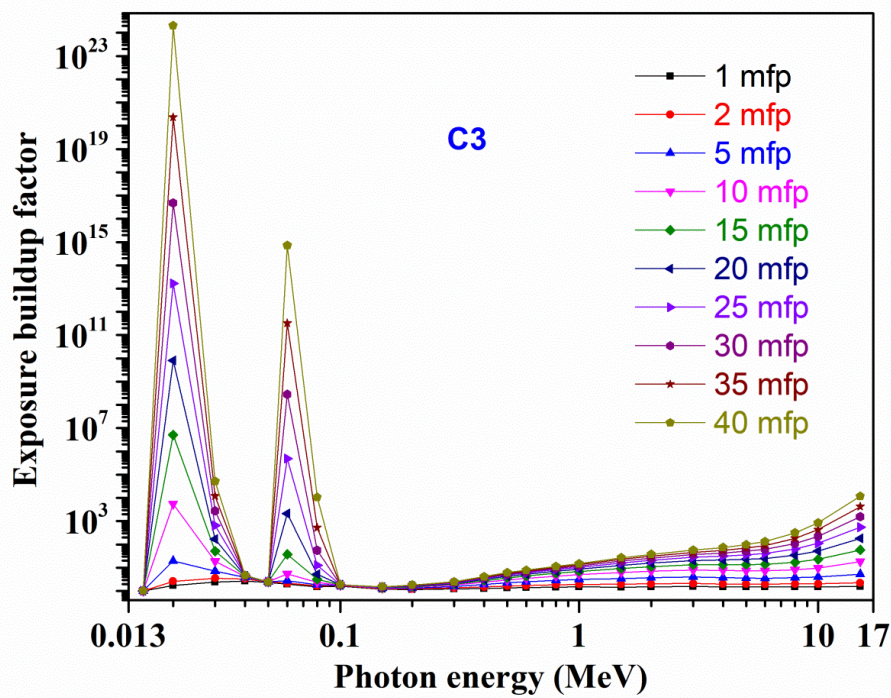

(b)



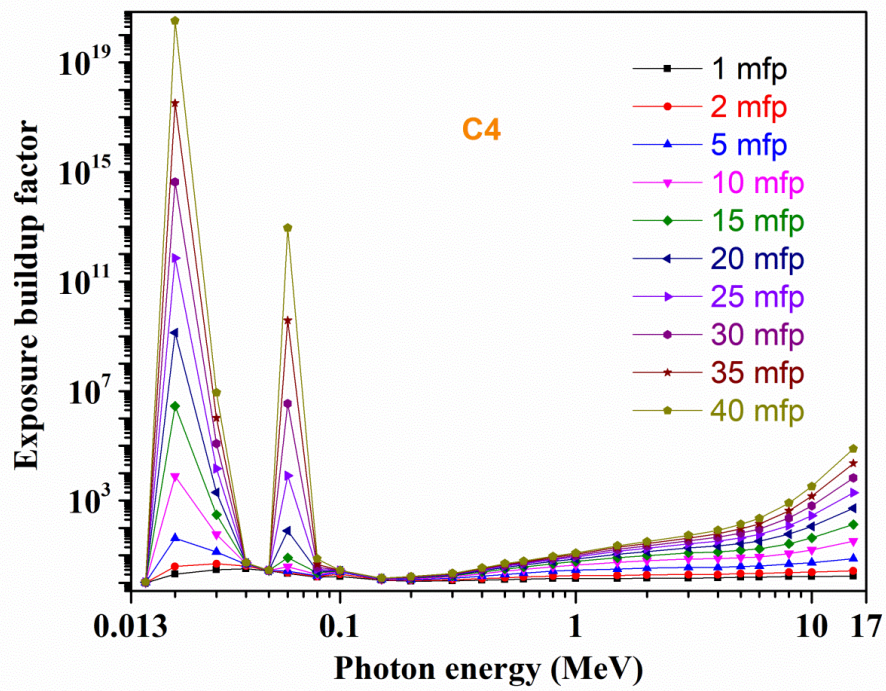

(c)

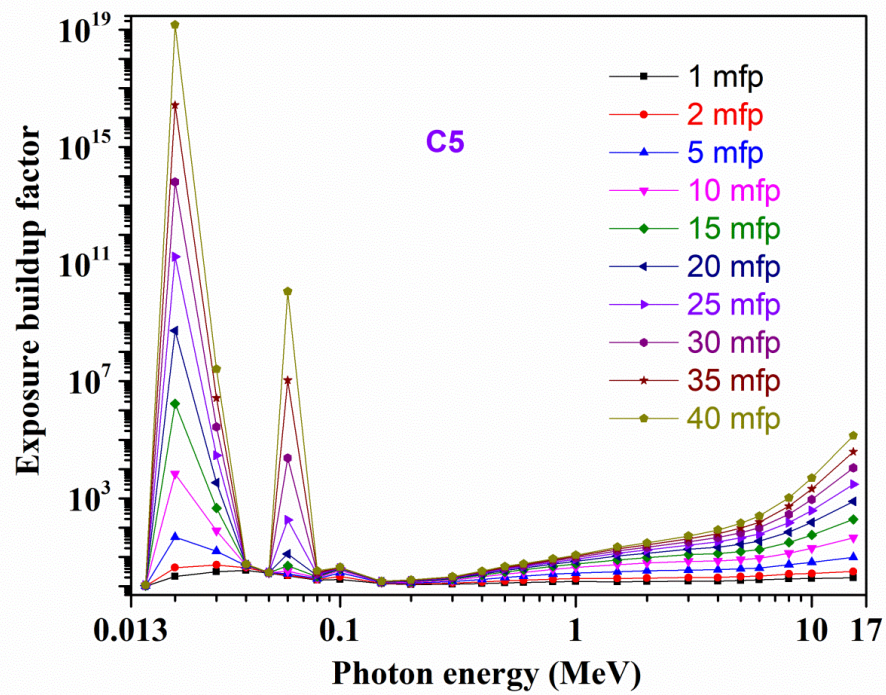

(d)



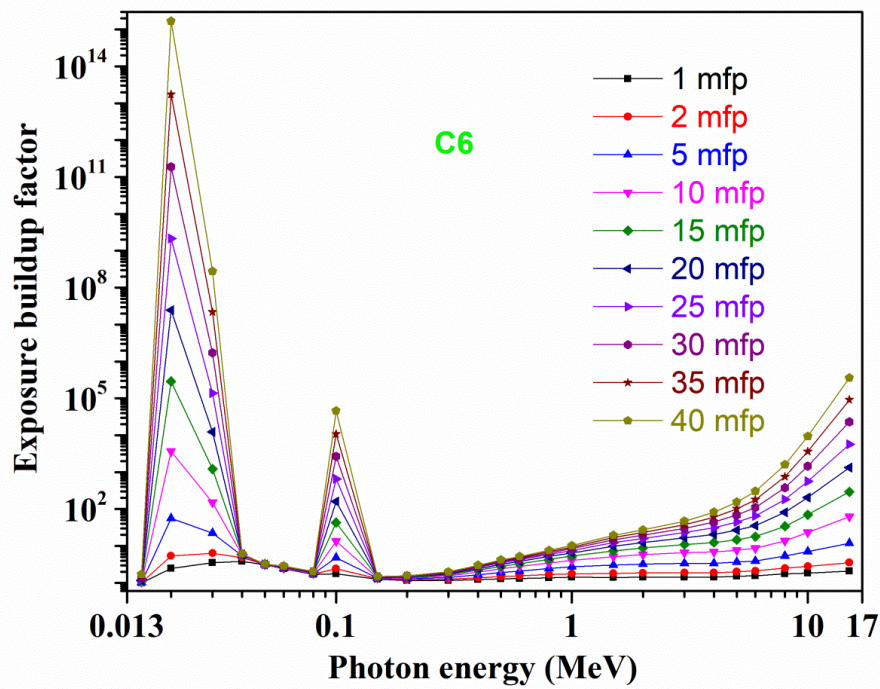

(e)

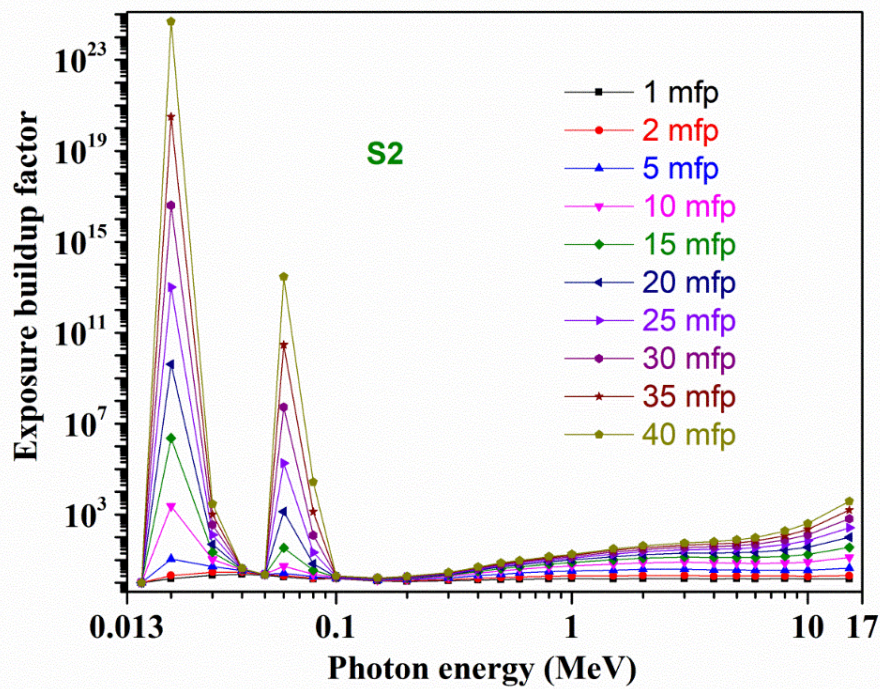

(f)



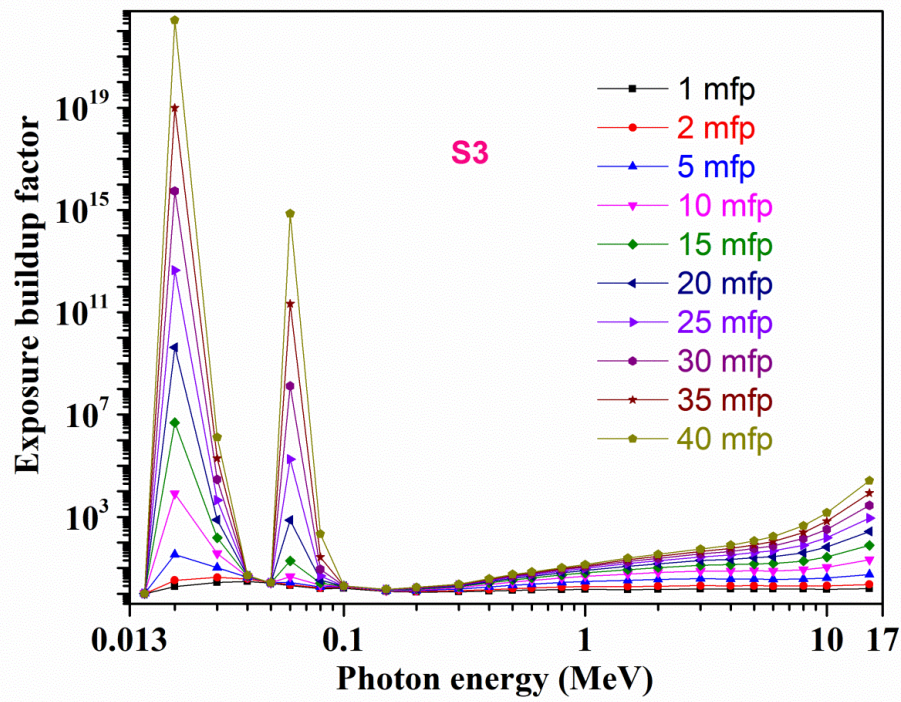

(g)

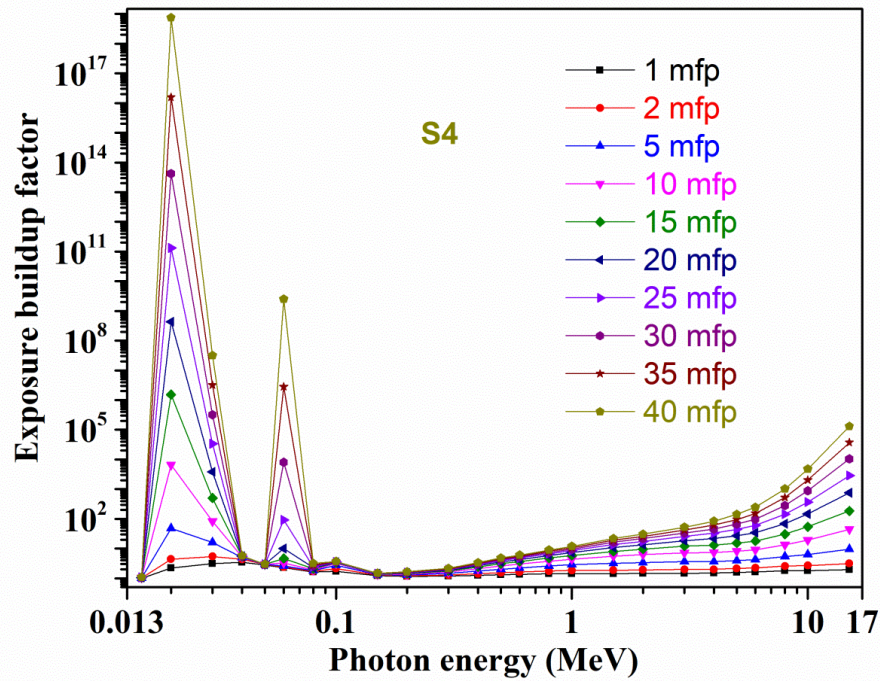

(h)



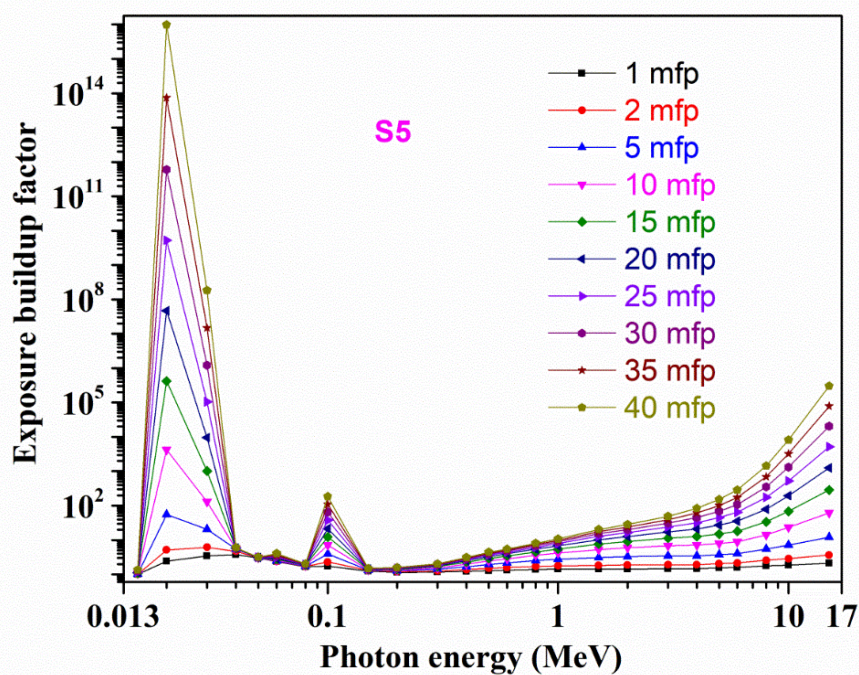

(i)

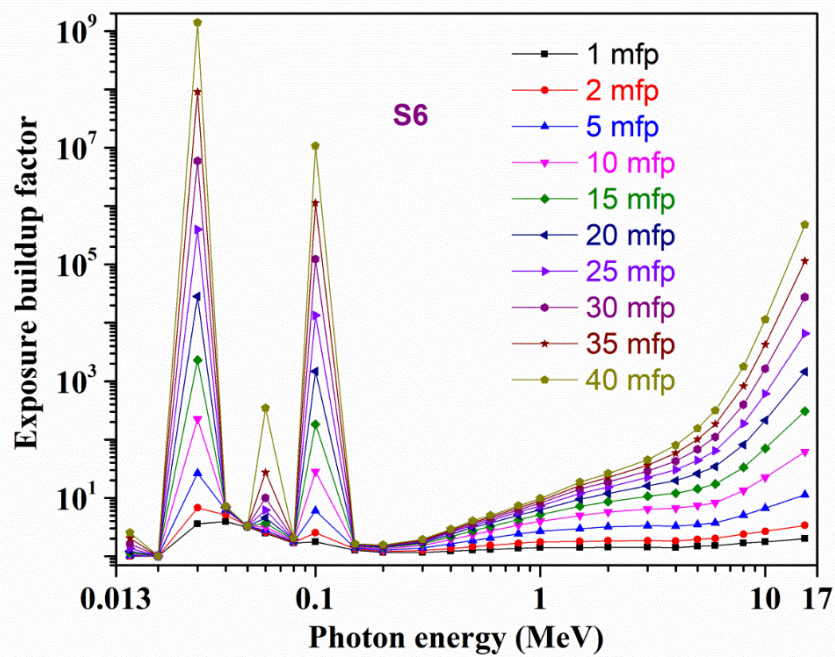

(j)

**Figure S9.** Variations of exposure buildup factor (EBF) with photon energy at different mean free paths for all (a-e) C2–C6 and (f-j) S2–S6 glasses.



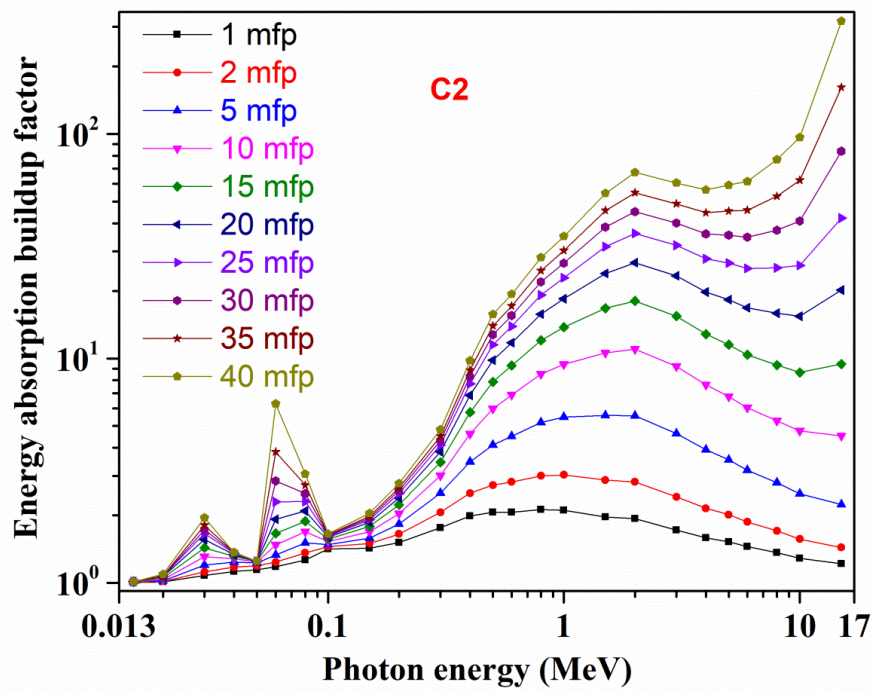

(a)

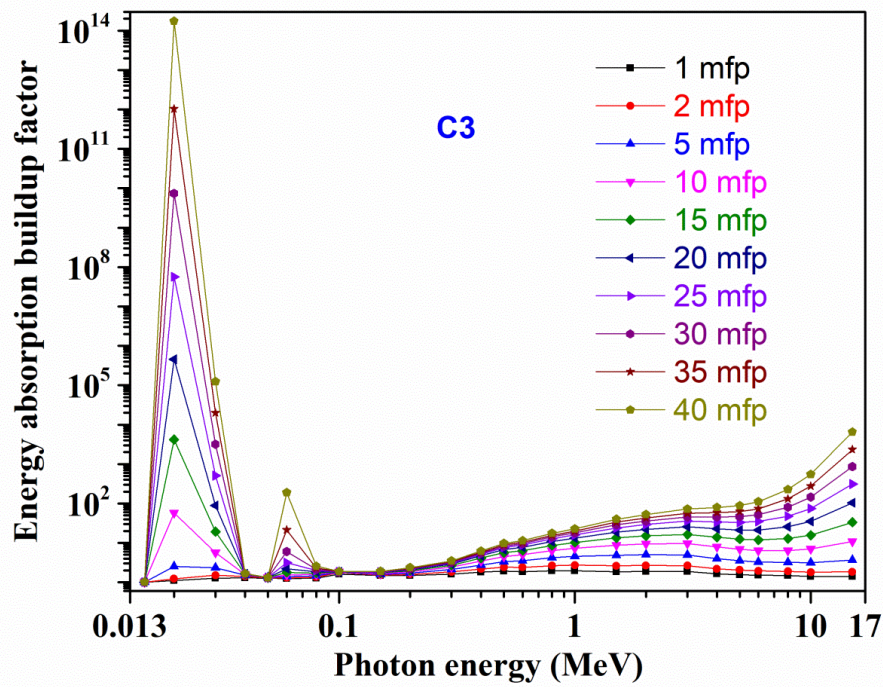

(b)



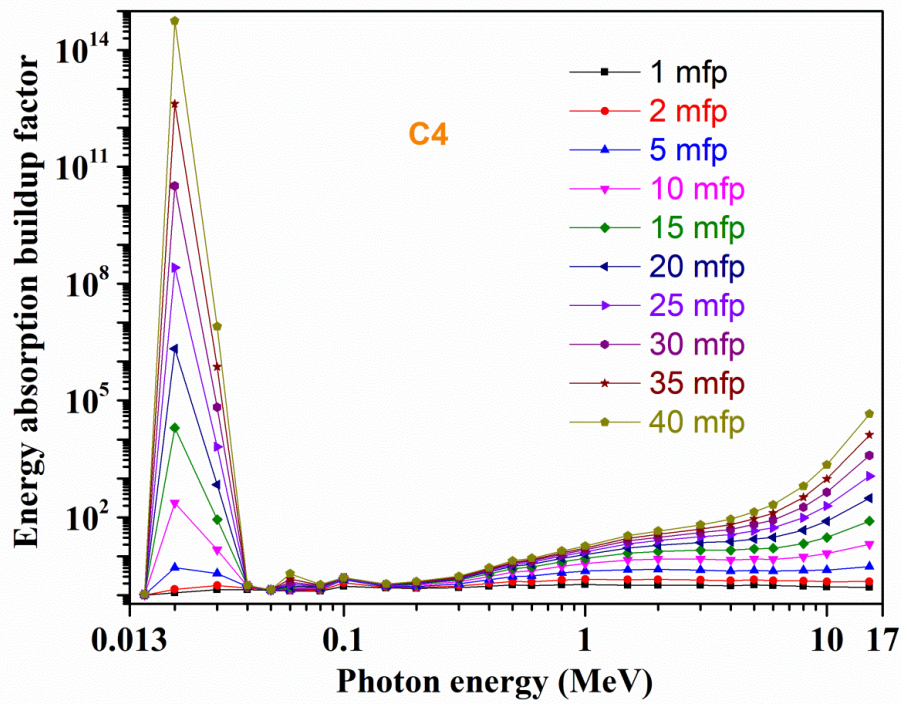

(c)

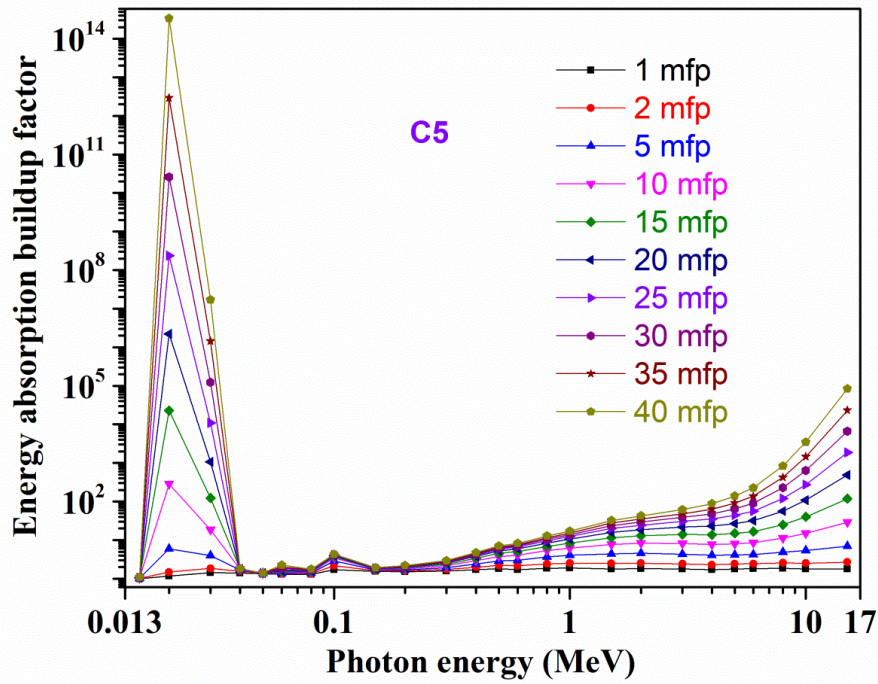

(d)



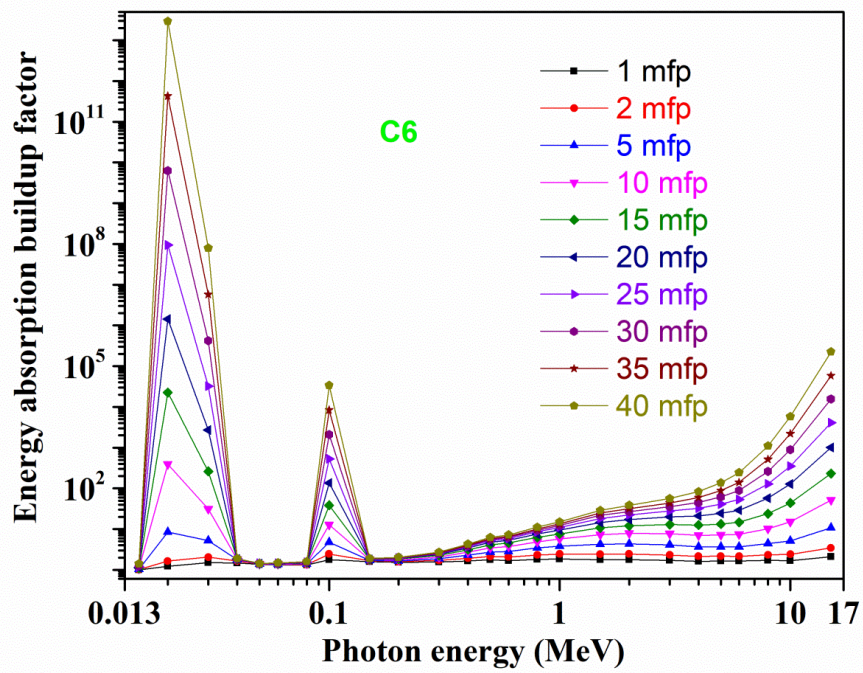

(e)

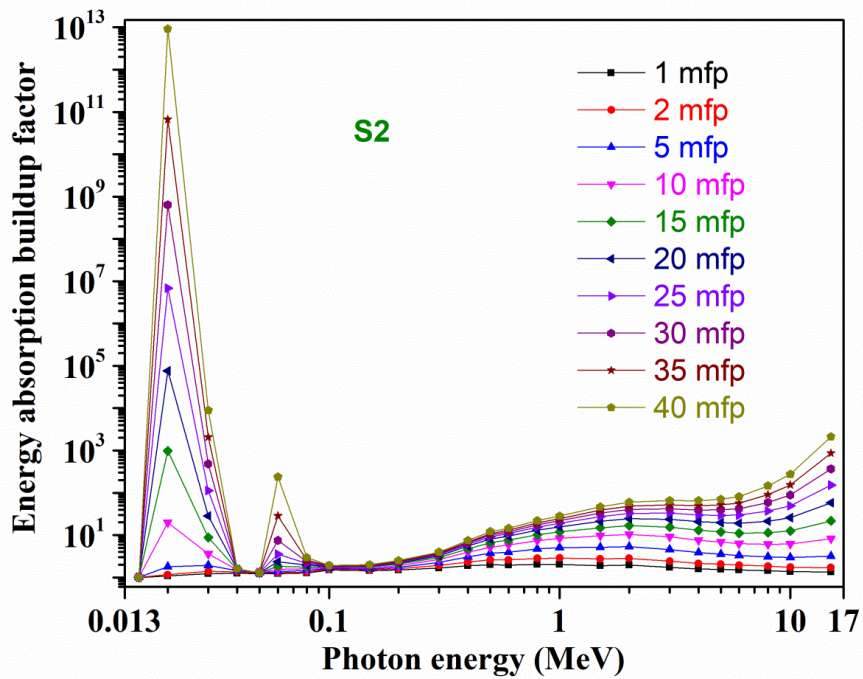

(f)



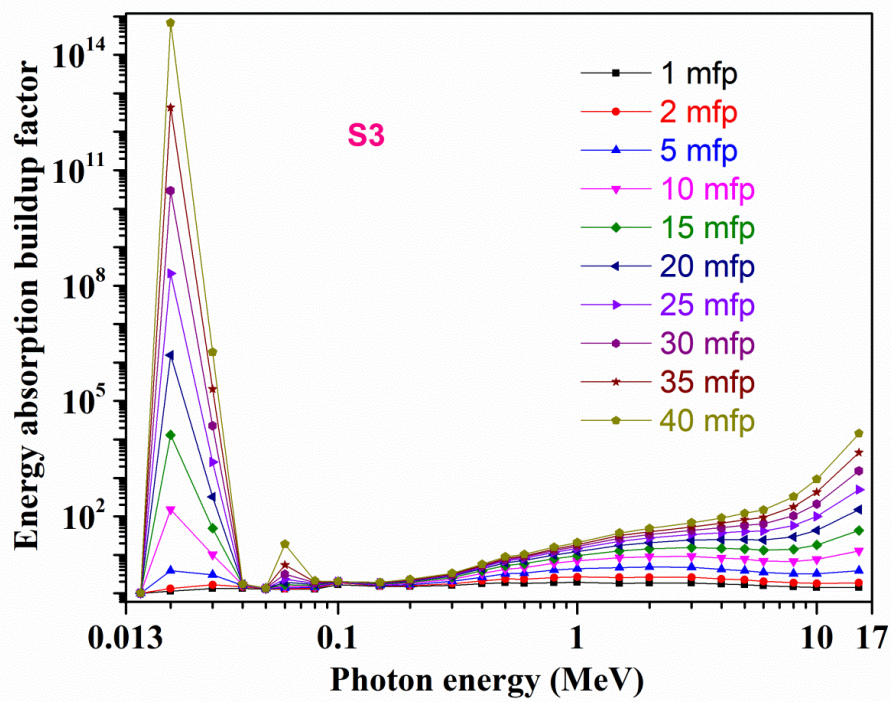

(g)

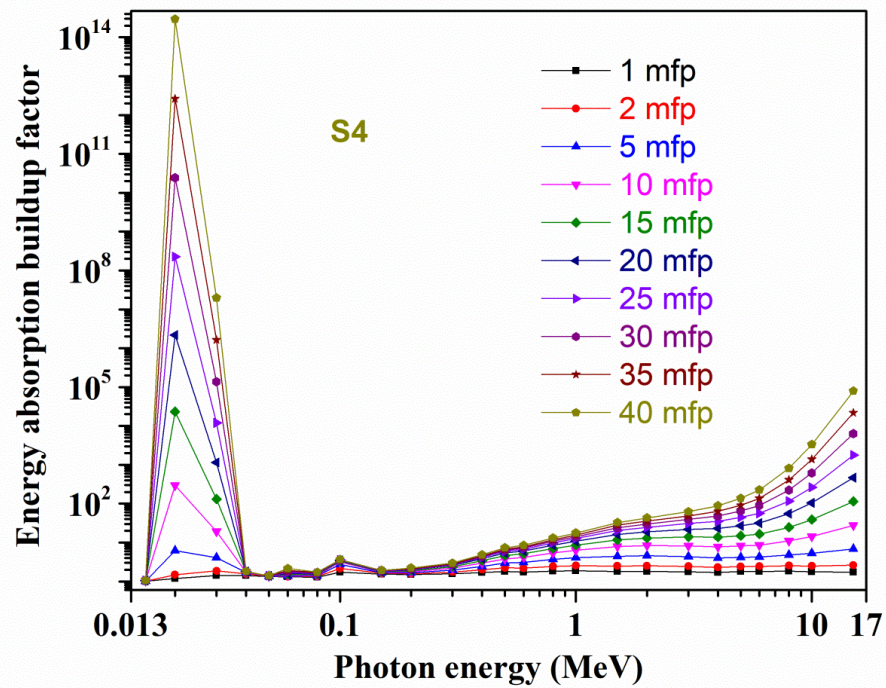

(h)



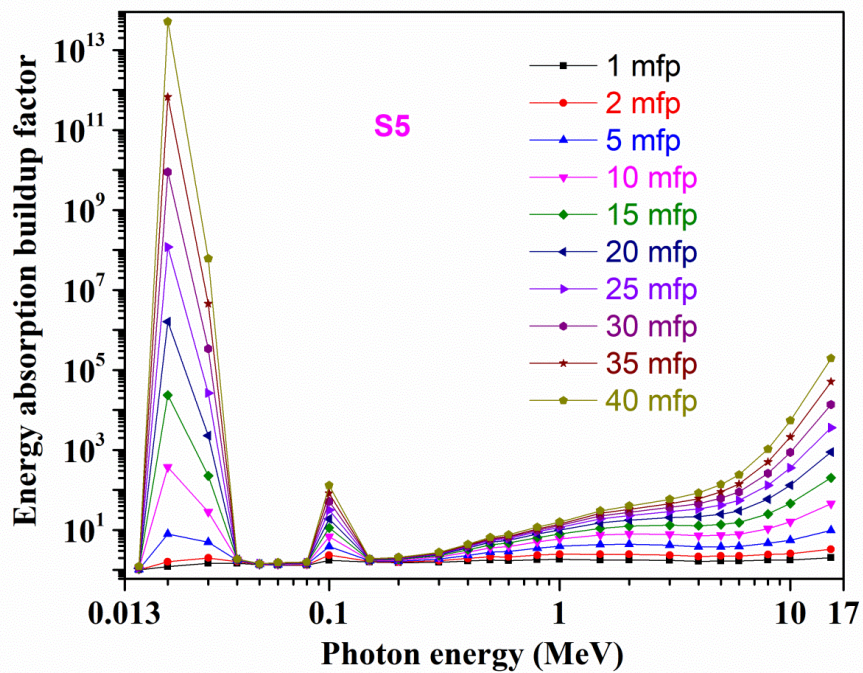

(i)

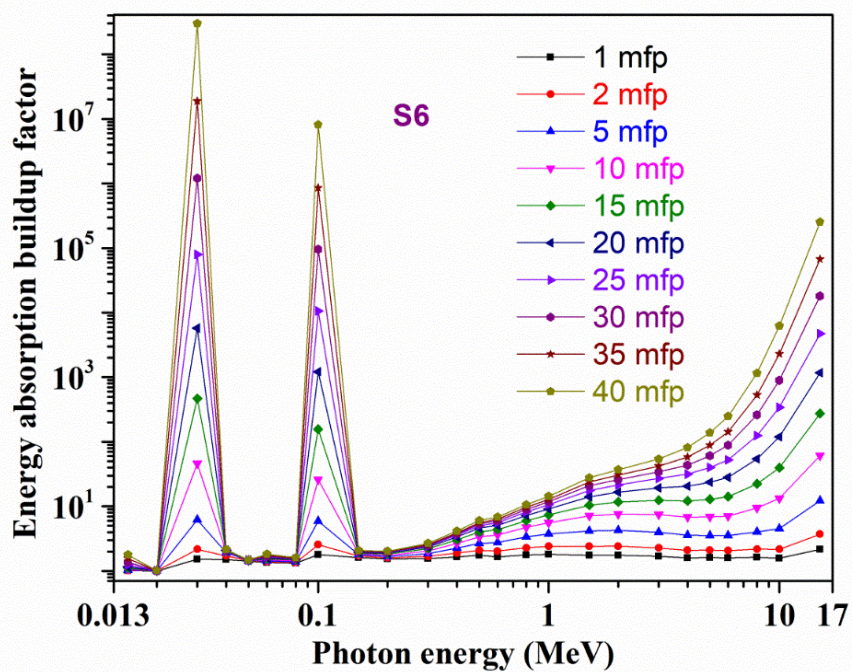

(j)

**Figure S10.** Variations of energy absorption buildup factor (EABF) with photon energy at different mean free paths for all (a-e) C2–C6 and (f-j) S2–S6 glasses.

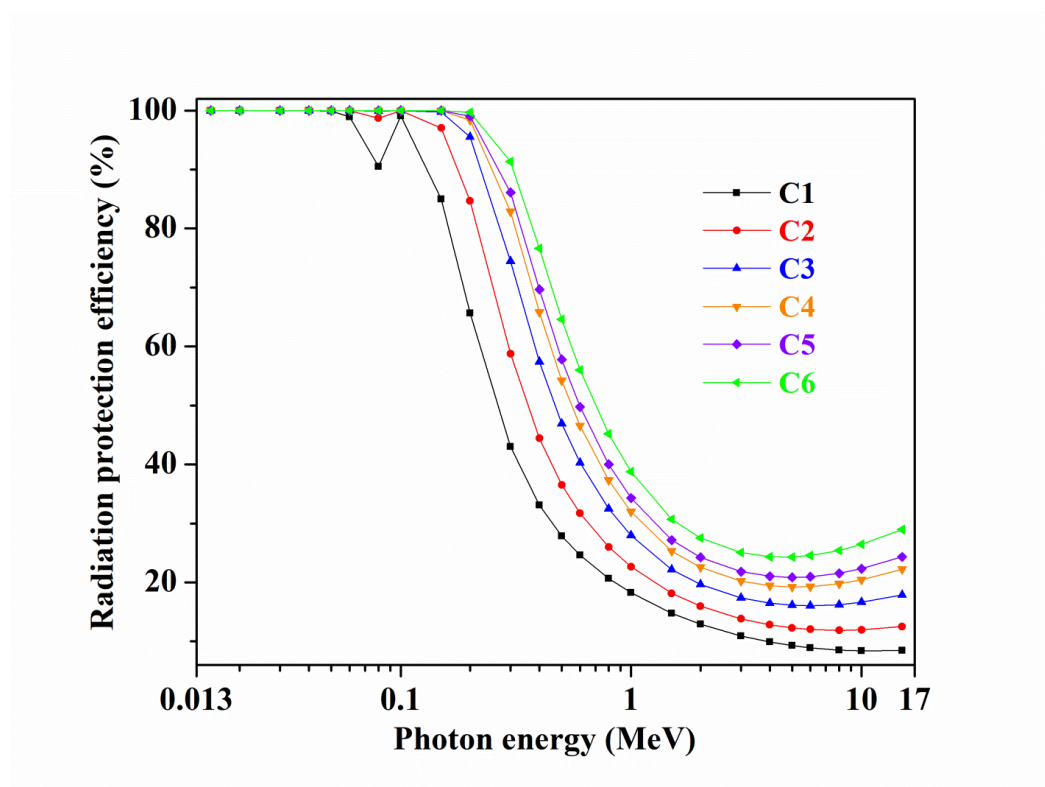

Figure S11. Variations of radiation protection efficiency (RPE) with photon energy (MeV) for all C1–C6 glasses.



**Table S1.** Mass attenuation coefficients ( $\mu/\rho$ ) of all C1–C6 glasses estimated using (i) Phy-X/PSD program (ii) MCNPX (iii) Geant4 and (iv) Penelope codes.

| (i) Phy-X/PSD program |             |           |          |           |           |           |
|-----------------------|-------------|-----------|----------|-----------|-----------|-----------|
| Energy (MeV)          | Sample code |           |          |           |           |           |
|                       | C1          | C2        | C3       | C4        | C5        | C6        |
| 0.015                 | 32.569      | 50.21     | 68.51    | 80.572    | 83.502    | 91.727    |
| 0.02                  | 23.715      | 37.412    | 52.177   | 61.534    | 64.048    | 70.562    |
| 0.03                  | 8.341       | 13.152    | 18.372   | 21.658    | 22.556    | 24.851    |
| 0.04                  | 3.996       | 6.2667    | 8.7402   | 10.291    | 10.719    | 11.805    |
| 0.05                  | 2.282       | 3.5439    | 4.9224   | 5.7844    | 6.0238    | 6.6281    |
| 0.06                  | 1.464       | 2.2436    | 3.0968   | 3.6292    | 3.7779    | 4.1516    |
| 0.08                  | 0.759       | 1.1232    | 1.5229   | 1.7717    | 1.8416    | 2.0164    |
| 0.1                   | 1.520       | 2.3829    | 3.3515   | 3.9406    | 4.1155    | 4.5347    |
| 0.15                  | 0.610       | 0.9115    | 1.2497   | 1.4553    | 1.5164    | 1.6628    |
| 0.2                   | 0.344       | 0.4855    | 0.6437   | 0.74      | 0.7685    | 0.837     |
| 0.3                   | 0.181       | 0.2294    | 0.2834   | 0.3164    | 0.3261    | 0.3495    |
| 0.4                   | 0.129       | 0.152     | 0.1772   | 0.1926    | 0.1971    | 0.208     |
| 0.5                   | 0.105       | 0.1177    | 0.1315   | 0.14      | 0.1425    | 0.1485    |
| 0.6                   | 0.091       | 0.0987    | 0.1071   | 0.1122    | 0.1137    | 0.1174    |
| 0.8                   | 0.075       | 0.078     | 0.0816   | 0.0838    | 0.0844    | 0.086     |
| 1                     | 0.065       | 0.0665    | 0.0681   | 0.0692    | 0.0694    | 0.0702    |
| 1.5                   | 0.051       | 0.0518    | 0.0521   | 0.0523    | 0.0524    | 0.0525    |
| 2                     | 0.045       | 0.045     | 0.0455   | 0.0458    | 0.0458    | 0.0461    |
| 3                     | 0.037       | 0.0385    | 0.0397   | 0.0405    | 0.0407    | 0.0412    |
| 4                     | 0.034       | 0.0355    | 0.0374   | 0.0387    | 0.039     | 0.0399    |
| 5                     | 0.031       | 0.034     | 0.0365   | 0.0383    | 0.0386    | 0.0398    |
| 6                     | 0.030       | 0.0332    | 0.0363   | 0.0384    | 0.0389    | 0.0403    |
| 8                     | 0.029       | 0.0327    | 0.0368   | 0.0395    | 0.0401    | 0.0419    |
| 10                    | 0.028       | 0.033     | 0.0378   | 0.041     | 0.0418    | 0.0439    |
| 15                    | 0.029       | 0.0346    | 0.0409   | 0.0451    | 0.0461    | 0.0489    |
| (ii) MCNPX code       |             |           |          |           |           |           |
| Energy (MeV)          | Sample code |           |          |           |           |           |
|                       | C1          | C2        | C3       | C4        | C5        | C6        |
| 0.015                 | 32.857143   | 50.605812 | 68.54781 | 80.704324 | 83.602142 | 91.803251 |
| 0.02                  | 24.086651   | 37.586614 | 52.32745 | 61.638751 | 64.125644 | 70.632744 |
| 0.03                  | 8.452330    | 13.195230 | 18.46521 | 21.746336 | 22.598742 | 24.963562 |
| 0.04                  | 4.087443    | 6.295471  | 8.866254 | 10.308734 | 10.756983 | 11.856915 |
| 0.05                  | 2.300875    | 3.600854  | 4.99851  | 5.798541  | 6.109854  | 6.630984  |
| 0.06                  | 1.531446    | 2.306217  | 3.106981 | 3.636587  | 3.799875  | 4.163254  |
| 0.08                  | 0.768741    | 1.141246  | 1.545417 | 1.785476  | 1.863571  | 2.045571  |
| 0.1                   | 1.535975    | 2.390651  | 3.378355 | 3.959874  | 4.132964  | 4.545876  |
| 0.15                  | 0.619554    | 0.920574  | 1.250972 | 1.463587  | 1.521743  | 1.679324  |
| 0.2                   | 0.351400    | 0.490651  | 0.650365 | 0.752174  | 0.775586  | 0.841782  |
| 0.3                   | 0.188874    | 0.231174  | 0.290744 | 0.318967  | 0.329873  | 0.350695  |
| 0.4                   | 0.130985    | 0.156387  | 0.180654 | 0.195324  | 0.199751  | 0.209351  |
| 0.5                   | 0.110775    | 0.119541  | 0.140632 | 0.146373  | 0.143623  | 0.149532  |
| 0.6                   | 0.100054    | 0.099871  | 0.112718 | 0.113288  | 0.115214  | 0.118047  |
| 0.8                   | 0.075954    | 0.079844  | 0.082324 | 0.083984  | 0.085693  | 0.087462  |
| 1                     | 0.066338    | 0.067324  | 0.069065 | 0.070543  | 0.070416  | 0.071087  |
| 1.5                   | 0.052743    | 0.052174  | 0.053271 | 0.054539  | 0.053975  | 0.053065  |
| 2                     | 0.046089    | 0.046338  | 0.045987 | 0.048754  | 0.046398  | 0.046874  |
| 3                     | 0.038047    | 0.039674  | 0.039951 | 0.041247  | 0.040899  | 0.041365  |
| 4                     | 0.034681    | 0.036991  | 0.037514 | 0.039365  | 0.039327  | 0.040542  |
| 5                     | 0.032005    | 0.034875  | 0.036637 | 0.038693  | 0.038706  | 0.039951  |
| 6                     | 0.032317    | 0.033636  | 0.036478 | 0.038658  | 0.039005  | 0.040605  |
| 8                     | 0.029782    | 0.0328969 | 0.036994 | 0.039861  | 0.040354  | 0.042004  |

| 10                 | 0.028887    | 0.033565 | 0.037866 | 0.041563 | 0.041954 | 0.044052 |
|--------------------|-------------|----------|----------|----------|----------|----------|
| 15                 | 0.029691    | 0.034861 | 0.041402 | 0.045284 | 0.046239 | 0.049056 |
| (iii) Geant4 code  |             |          |          |          |          |          |
| Energy (MeV)       | Sample code |          |          |          |          |          |
|                    | C1          | C2       | C3       | C4       | C5       | C6       |
| 0.015              | 32.5480     | 50.1753  | 68.4595  | 80.5110  | 83.4382  | 91.6563  |
| 0.02               | 23.6252     | 37.2658  | 51.9656  | 61.2843  | 63.7864  | 70.2718  |
| 0.03               | 8.3366      | 13.1451  | 18.3617  | 21.6463  | 22.5433  | 24.8374  |
| 0.04               | 3.9881      | 6.2536   | 8.7212   | 10.2686  | 10.6954  | 11.7785  |
| 0.05               | 2.2728      | 3.5291   | 4.9010   | 5.7590   | 5.9973   | 6.5988   |
| 0.06               | 1.4542      | 2.2277   | 3.0740   | 3.6022   | 3.7496   | 4.1203   |
| 0.08               | 0.7475      | 1.1046   | 1.4961   | 1.7400   | 1.8084   | 1.9797   |
| 0.1                | 1.5140      | 2.3733   | 3.3377   | 3.9242   | 4.0984   | 4.5158   |
| 0.15               | 0.6081      | 0.9081   | 1.2448   | 1.4495   | 1.5104   | 1.6561   |
| 0.2                | 0.3435      | 0.4840   | 0.6416   | 0.7375   | 0.7660   | 0.8342   |
| 0.3                | 0.1806      | 0.2285   | 0.2821   | 0.3148   | 0.3245   | 0.3477   |
| 0.4                | 0.1291      | 0.1514   | 0.1763   | 0.1916   | 0.1960   | 0.2068   |
| 0.5                | 0.1050      | 0.1172   | 0.1309   | 0.1393   | 0.1417   | 0.1476   |
| 0.6                | 0.0908      | 0.0983   | 0.1065   | 0.1116   | 0.1130   | 0.1166   |
| 0.8                | 0.0745      | 0.0777   | 0.0812   | 0.0834   | 0.0840   | 0.0855   |
| 1                  | 0.0648      | 0.0663   | 0.0678   | 0.0688   | 0.0691   | 0.0698   |
| 1.5                | 0.0513      | 0.0516   | 0.0519   | 0.0521   | 0.0521   | 0.0523   |
| 2                  | 0.0444      | 0.0449   | 0.0453   | 0.0457   | 0.0457   | 0.0459   |
| 3                  | 0.0372      | 0.0384   | 0.0396   | 0.0404   | 0.0406   | 0.0411   |
| 4                  | 0.0335      | 0.0354   | 0.0373   | 0.0387   | 0.0389   | 0.0398   |
| 5                  | 0.0314      | 0.0339   | 0.0365   | 0.0382   | 0.0386   | 0.0397   |
| 6                  | 0.0301      | 0.0331   | 0.0362   | 0.0383   | 0.0388   | 0.0402   |
| 8                  | 0.0287      | 0.0327   | 0.0367   | 0.0394   | 0.0401   | 0.0419   |
| 10                 | 0.0283      | 0.0330   | 0.0377   | 0.0410   | 0.0417   | 0.0439   |
| 15                 | 0.0285      | 0.0346   | 0.0409   | 0.0451   | 0.0460   | 0.0489   |
| (iv) Penelope code |             |          |          |          |          |          |
| Energy (MeV)       | Sample code |          |          |          |          |          |
|                    | C1          | C2       | C3       | C4       | C5       | C6       |
| 0.015              | 31.9019     | 49.1454  | 67.0038  | 78.7932  | 81.6587  | 89.6775  |
| 0.02               | 23.1587     | 36.5134  | 50.8941  | 60.0176  | 62.4735  | 68.8096  |
| 0.03               | 8.1860      | 12.9012  | 18.0138  | 21.2346  | 22.1168  | 24.3620  |
| 0.04               | 3.9209      | 6.1444   | 8.5652   | 10.0838  | 10.5041  | 11.5650  |
| 0.05               | 2.2370      | 3.4706   | 4.8173   | 5.6598   | 5.8946   | 6.4841   |
| 0.06               | 1.4332      | 2.1930   | 3.0242   | 3.5432   | 3.6885   | 4.0520   |
| 0.08               | 0.7382      | 1.0892   | 1.4739   | 1.7136   | 1.7810   | 1.9491   |
| 0.1                | 1.4952      | 2.3422   | 3.2929   | 3.8711   | 4.0435   | 4.4542   |
| 0.15               | 0.6031      | 0.8996   | 1.2325   | 1.4349   | 1.4953   | 1.6390   |
| 0.2                | 0.3409      | 0.4796   | 0.6353   | 0.7300   | 0.7582   | 0.8255   |
| 0.3                | 0.1798      | 0.2271   | 0.2801   | 0.3124   | 0.3219   | 0.3448   |
| 0.4                | 0.1287      | 0.1507   | 0.1753   | 0.1903   | 0.1948   | 0.2054   |
| 0.5                | 0.1047      | 0.1169   | 0.1303   | 0.1386   | 0.1410   | 0.1468   |
| 0.6                | 0.0907      | 0.0981   | 0.1062   | 0.1112   | 0.1126   | 0.1162   |
| 0.8                | 0.0744      | 0.0776   | 0.0810   | 0.0832   | 0.0838   | 0.0853   |
| 1                  | 0.0647      | 0.0662   | 0.0677   | 0.0687   | 0.0690   | 0.0697   |
| 1.5                | 0.0513      | 0.0516   | 0.0519   | 0.0521   | 0.0521   | 0.0522   |
| 2                  | 0.0444      | 0.0449   | 0.0453   | 0.0456   | 0.0456   | 0.0458   |
| 3                  | 0.0372      | 0.0384   | 0.0396   | 0.0404   | 0.0406   | 0.0411   |
| 4                  | 0.0335      | 0.0354   | 0.0373   | 0.0386   | 0.0389   | 0.0398   |
| 5                  | 0.0314      | 0.0339   | 0.0364   | 0.0382   | 0.0385   | 0.0397   |
| 6                  | 0.0301      | 0.0331   | 0.0362   | 0.0383   | 0.0388   | 0.0402   |



---

|    |        |        |        |        |        |        |
|----|--------|--------|--------|--------|--------|--------|
| 8  | 0.0287 | 0.0327 | 0.0367 | 0.0394 | 0.0400 | 0.0419 |
| 10 | 0.0282 | 0.0329 | 0.0377 | 0.0409 | 0.0417 | 0.0439 |
| 15 | 0.0285 | 0.0346 | 0.0409 | 0.0450 | 0.0460 | 0.0489 |

---

**Table S2.** Mass attenuation coefficients ( $\mu/\rho$ ) of all S1–S6 glasses estimated using (i) Phy-X/PSD program (ii) MCNPX (iii) Geant4 and (iv) Penelope codes

| (i) Phy-X/PSD program |             |           |           |           |           |           |
|-----------------------|-------------|-----------|-----------|-----------|-----------|-----------|
| Energy (MeV)          | Sample code |           |           |           |           |           |
|                       | S1          | S2        | S3        | S4        | S5        | S6        |
| 0.015                 | 30.582      | 56.867    | 71.979    | 81.391    | 87.835    | 94.419    |
| 0.02                  | 35.998      | 48.395    | 57.847    | 64.685    | 69.367    | 74.151    |
| 0.03                  | 12.473      | 16.983    | 20.347    | 22.757    | 24.408    | 26.094    |
| 0.04                  | 5.851       | 8.0517    | 9.6596    | 10.801    | 11.583    | 12.381    |
| 0.05                  | 3.263       | 4.522     | 5.4259    | 6.0624    | 6.4981    | 6.9434    |
| 0.06                  | 2.041       | 2.8393    | 3.4033    | 3.7976    | 4.0675    | 4.3434    |
| 0.08                  | 1.005       | 1.3941    | 1.6621    | 1.8473    | 1.9741    | 2.1036    |
| 0.1                   | 1.503       | 2.8285    | 3.5777    | 4.0392    | 4.3551    | 4.6779    |
| 0.15                  | 0.596       | 1.0639    | 1.327     | 1.4884    | 1.5989    | 1.7118    |
| 0.2                   | 0.334       | 0.5555    | 0.6792    | 0.7549    | 0.8067    | 0.8596    |
| 0.3                   | 0.175       | 0.2524    | 0.2951    | 0.321     | 0.3388    | 0.357     |
| 0.4                   | 0.125       | 0.1621    | 0.1823    | 0.1945    | 0.2028    | 0.2113    |
| 0.5                   | 0.102       | 0.1228    | 0.1341    | 0.1409    | 0.1455    | 0.1502    |
| 0.6                   | 0.088       | 0.1015    | 0.1085    | 0.1126    | 0.1154    | 0.1183    |
| 0.8                   | 0.073       | 0.0787    | 0.0819    | 0.0838    | 0.085     | 0.0863    |
| 1                     | 0.063       | 0.0665    | 0.0681    | 0.069     | 0.0696    | 0.0702    |
| 1.5                   | 0.050       | 0.0513    | 0.0519    | 0.0521    | 0.0523    | 0.0524    |
| 2                     | 0.044       | 0.0448    | 0.0453    | 0.0456    | 0.0458    | 0.046     |
| 3                     | 0.037       | 0.0388    | 0.0398    | 0.0405    | 0.0409    | 0.0414    |
| 4                     | 0.034       | 0.0363    | 0.0378    | 0.0388    | 0.0395    | 0.0402    |
| 5                     | 0.032       | 0.0351    | 0.0371    | 0.0385    | 0.0394    | 0.0403    |
| 6                     | 0.031       | 0.0347    | 0.0371    | 0.0387    | 0.0398    | 0.0409    |
| 8                     | 0.030       | 0.0348    | 0.0379    | 0.0399    | 0.0413    | 0.0427    |
| 10                    | 0.030       | 0.0355    | 0.0391    | 0.0415    | 0.0432    | 0.0449    |
| 15                    | 0.031       | 0.038     | 0.0427    | 0.0458    | 0.048     | 0.0502    |
| (ii) MCNPX code       |             |           |           |           |           |           |
| Energy (MeV)          | Sample code |           |           |           |           |           |
|                       | S1          | S2        | S3        | S4        | S5        | S6        |
| 0.015                 | 30.635742   | 56.932541 | 71.983365 | 81.407411 | 87.869851 | 94.456241 |
| 0.02                  | 36.109814   | 48.412387 | 57.863651 | 64.696524 | 69.374451 | 74.178954 |
| 0.03                  | 12.512965   | 16.995813 | 20.357434 | 22.763998 | 24.450688 | 26.105648 |
| 0.04                  | 5.885377    | 8.100874  | 9.663074  | 10.806384 | 11.593372 | 12.390654 |
| 0.05                  | 3.295267    | 4.563906  | 5.432147  | 6.063654  | 6.500413  | 6.948914  |
| 0.06                  | 2.063086    | 2.845714  | 3.406221  | 3.798142  | 4.098541  | 4.344156  |
| 0.08                  | 1.050631    | 1.403365  | 1.663221  | 1.848215  | 1.976384  | 2.104069  |
| 0.1                   | 1.524185    | 2.832874  | 3.578065  | 4.039974  | 4.359852  | 4.679074  |
| 0.15                  | 0.599874    | 1.086055  | 1.328064  | 1.489008  | 1.600540  | 1.713261  |
| 0.2                   | 0.335039    | 0.560380  | 0.679974  | 0.755047  | 0.810746  | 0.860094  |
| 0.3                   | 0.176054    | 0.256371  | 0.296327  | 0.321563  | 0.339997  | 0.358412  |
| 0.4                   | 0.126310    | 0.164571  | 0.183058  | 0.194893  | 0.203621  | 0.212361  |
| 0.5                   | 0.104682    | 0.123652  | 0.134638  | 0.141004  | 0.146174  | 0.151274  |
| 0.6                   | 0.089151    | 0.103650  | 0.108983  | 0.112865  | 0.116032  | 0.119063  |
| 0.8                   | 0.073257    | 0.079541  | 0.082047  | 0.083912  | 0.085852  | 0.087031  |
| 1                     | 0.064165    | 0.067411  | 0.068633  | 0.069537  | 0.069984  | 0.071421  |
| 1.5                   | 0.051216    | 0.052321  | 0.052074  | 0.052325  | 0.052463  | 0.052563  |
| 2                     | 0.043965    | 0.045699  | 0.045638  | 0.045714  | 0.045991  | 0.046515  |
| 3                     | 0.037031    | 0.039065  | 0.039997  | 0.040612  | 0.041054  | 0.041532  |
| 4                     | 0.034055    | 0.036458  | 0.037955  | 0.038925  | 0.039864  | 0.040315  |
| 5                     | 0.032099    | 0.035450  | 0.037326  | 0.038632  | 0.039526  | 0.040412  |
| 6                     | 0.031021    | 0.034932  | 0.037274  | 0.038800  | 0.039997  | 0.041065  |



| 8                  | 0.031078    | 0.034991 | 0.037985 | 0.040054 | 0.041417 | 0.042803 |
|--------------------|-------------|----------|----------|----------|----------|----------|
| 10                 | 0.030652    | 0.035745 | 0.039234 | 0.041601 | 0.043326 | 0.044997 |
| 15                 | 0.031563    | 0.038174 | 0.042813 | 0.045854 | 0.048164 | 0.050325 |
| (iii) Geant4 code  |             |          |          |          |          |          |
| Energy (MeV)       | Sample code |          |          |          |          |          |
|                    | S1          | S2       | S3       | S4       | S5       | S6       |
| 0.015              | 30.4967     | 56.8002  | 71.9114  | 81.3181  | 87.7584  | 94.3393  |
| 0.02               | 35.8883     | 48.2103  | 57.6165  | 64.4250  | 69.0864  | 73.8497  |
| 0.03               | 12.4730     | 16.9765  | 20.3371  | 22.7458  | 24.3950  | 26.0801  |
| 0.04               | 5.8462      | 8.0371   | 9.6399   | 10.7785  | 11.5581  | 12.3547  |
| 0.05               | 3.2559      | 4.5050   | 5.4034   | 6.0367   | 6.4703   | 6.9133   |
| 0.06               | 2.0341      | 2.8210   | 3.3792   | 3.7701   | 4.0378   | 4.3113   |
| 0.08               | 0.9953      | 1.3722   | 1.6337   | 1.8149   | 1.9390   | 2.0658   |
| 0.1                | 1.4985      | 2.8173   | 3.5631   | 4.0225   | 4.3370   | 4.6585   |
| 0.15               | 0.5938      | 1.0598   | 1.3218   | 1.4825   | 1.5925   | 1.7049   |
| 0.2                | 0.3335      | 0.5538   | 0.6770   | 0.7524   | 0.8040   | 0.8567   |
| 0.3                | 0.1748      | 0.2513   | 0.2937   | 0.3195   | 0.3371   | 0.3552   |
| 0.4                | 0.1250      | 0.1614   | 0.1814   | 0.1935   | 0.2017   | 0.2102   |
| 0.5                | 0.1017      | 0.1223   | 0.1334   | 0.1401   | 0.1447   | 0.1493   |
| 0.6                | 0.0881      | 0.1010   | 0.1079   | 0.1119   | 0.1147   | 0.1176   |
| 0.8                | 0.0723      | 0.0784   | 0.0815   | 0.0833   | 0.0845   | 0.0858   |
| 1                  | 0.0629      | 0.0662   | 0.0678   | 0.0687   | 0.0692   | 0.0698   |
| 1.5                | 0.0499      | 0.0512   | 0.0517   | 0.0519   | 0.0520   | 0.0522   |
| 2                  | 0.0434      | 0.0446   | 0.0452   | 0.0455   | 0.0457   | 0.0459   |
| 3                  | 0.0368      | 0.0387   | 0.0397   | 0.0404   | 0.0408   | 0.0413   |
| 4                  | 0.0336      | 0.0362   | 0.0377   | 0.0387   | 0.0394   | 0.0401   |
| 5                  | 0.0319      | 0.0351   | 0.0371   | 0.0384   | 0.0393   | 0.0402   |
| 6                  | 0.0309      | 0.0346   | 0.0370   | 0.0386   | 0.0397   | 0.0408   |
| 8                  | 0.0301      | 0.0348   | 0.0378   | 0.0398   | 0.0412   | 0.0427   |
| 10                 | 0.0300      | 0.0355   | 0.0391   | 0.0415   | 0.0431   | 0.0448   |
| 15                 | 0.0310      | 0.0380   | 0.0426   | 0.0458   | 0.0479   | 0.0502   |
| (iv) Penelope code |             |          |          |          |          |          |
| Energy (MeV)       | Sample code |          |          |          |          |          |
|                    | S1          | S2       | S3       | S4       | S5       | S6       |
| 0.015              | 29.840      | 55.574   | 70.354   | 79.556   | 85.857   | 92.295   |
|                    | 9           | 2        | 7        | 9        | 3        | 2        |
| 0.02               | 35.424      | 47.313   | 56.470   | 63.126   | 67.683   | 72.339   |
|                    | 4           | 4        | 7        | 4        | 3        | 7        |
| 0.03               | 12.327      | 16.687   | 19.965   | 22.324   | 23.939   | 25.589   |
|                    | 7           | 3        | 9        | 5        | 4        | 5        |
| 0.04               | 5.7802      | 7.9071   | 9.4731   | 10.589   | 11.353   | 12.134   |
|                    |             |          |          | 2        | 4        | 3        |
| 0.05               | 3.2206      | 4.4352   | 5.3138   | 5.9350   | 6.3603   | 6.7949   |
| 0.06               | 2.0126      | 2.7794   | 3.3259   | 3.7096   | 3.9722   | 4.2407   |
| 0.08               | 0.9861      | 1.3537   | 1.6099   | 1.7878   | 1.9097   | 2.0342   |
| 0.1                | 1.4814      | 2.7805   | 3.5153   | 3.9682   | 4.2782   | 4.5950   |
| 0.15               | 0.5891      | 1.0497   | 1.3086   | 1.4675   | 1.5762   | 1.6874   |
| 0.2                | 0.3311      | 0.5486   | 0.6703   | 0.7447   | 0.7956   | 0.8477   |
| 0.3                | 0.1741      | 0.2496   | 0.2915   | 0.3169   | 0.3344   | 0.3522   |
| 0.4                | 0.1246      | 0.1606   | 0.1803   | 0.1922   | 0.2004   | 0.2087   |
| 0.5                | 0.1015      | 0.1218   | 0.1328   | 0.1394   | 0.1439   | 0.1485   |
| 0.6                | 0.0880      | 0.1008   | 0.1075   | 0.1116   | 0.1143   | 0.1171   |
| 0.8                | 0.0723      | 0.0783   | 0.0814   | 0.0831   | 0.0843   | 0.0856   |
| 1                  | 0.0629      | 0.0661   | 0.0677   | 0.0686   | 0.0691   | 0.0697   |
| 1.5                | 0.0499      | 0.0512   | 0.0516   | 0.0519   | 0.0520   | 0.0521   |

---

|    |        |        |        |        |        |        |
|----|--------|--------|--------|--------|--------|--------|
| 2  | 0.0434 | 0.0446 | 0.0451 | 0.0454 | 0.0456 | 0.0458 |
| 3  | 0.0368 | 0.0387 | 0.0397 | 0.0404 | 0.0408 | 0.0412 |
| 4  | 0.0336 | 0.0361 | 0.0377 | 0.0387 | 0.0394 | 0.0401 |
| 5  | 0.0318 | 0.0350 | 0.0370 | 0.0383 | 0.0392 | 0.0402 |
| 6  | 0.0309 | 0.0346 | 0.0370 | 0.0386 | 0.0397 | 0.0408 |
| 8  | 0.0301 | 0.0347 | 0.0378 | 0.0398 | 0.0412 | 0.0427 |
| 10 | 0.0300 | 0.0355 | 0.0391 | 0.0415 | 0.0431 | 0.0448 |
| 15 | 0.0310 | 0.0380 | 0.0426 | 0.0458 | 0.0479 | 0.0501 |

---



**Table S3.** Equivalent atomic numbers, G–P fitting parameters for EBF and EABF, respectively, for glass C1.

| Energy (MeV) | $Z_{eq}$ | G–P fitting parameters for EBF |       |       |        |        | G–P fitting parameters for EABF |       |       |        |        |
|--------------|----------|--------------------------------|-------|-------|--------|--------|---------------------------------|-------|-------|--------|--------|
|              |          | a                              | b     | c     | d      | $X_k$  | a                               | b     | c     | d      | $X_k$  |
| 0.015        | 20.49    | -0.032                         | 1.007 | 0.684 | 0.149  | 6.899  | -0.020                          | 1.007 | 0.674 | 0.133  | 9.343  |
| 0.02         | 24.33    | 0.509                          | 1.013 | 0.209 | -0.482 | 11.263 | 0.301                           | 1.012 | 0.286 | -0.265 | 16.457 |
| 0.03         | 25.42    | 0.193                          | 1.030 | 0.374 | -0.300 | 27.804 | 0.251                           | 1.029 | 0.322 | -0.187 | 18.356 |
| 0.04         | 26.18    | 0.247                          | 1.057 | 0.336 | -0.117 | 11.831 | 0.245                           | 1.057 | 0.335 | -0.142 | 14.673 |
| 0.05         | 26.77    | 0.235                          | 1.091 | 0.363 | -0.137 | 13.709 | 0.243                           | 1.096 | 0.346 | -0.137 | 13.994 |
| 0.06         | 27.25    | 0.221                          | 1.131 | 0.387 | -0.123 | 13.898 | 0.238                           | 1.147 | 0.358 | -0.142 | 14.627 |
| 0.08         | 28.03    | 0.188                          | 1.213 | 0.454 | -0.106 | 14.129 | 0.209                           | 1.275 | 0.410 | -0.118 | 14.615 |
| 0.1          | 45.81    | 0.488                          | 1.276 | 0.179 | -0.238 | 13.770 | 0.493                           | 1.265 | 0.161 | -0.263 | 13.601 |
| 0.15         | 47.87    | 0.253                          | 1.225 | 0.367 | -0.139 | 14.068 | 0.393                           | 1.440 | 0.216 | -0.216 | 13.920 |
| 0.2          | 49.09    | 0.171                          | 1.283 | 0.501 | -0.093 | 14.585 | 0.325                           | 1.693 | 0.286 | -0.192 | 13.932 |
| 0.3          | 50.57    | 0.108                          | 1.397 | 0.641 | -0.051 | 14.197 | 0.211                           | 1.908 | 0.447 | -0.120 | 13.796 |
| 0.4          | 51.43    | 0.070                          | 1.506 | 0.772 | -0.044 | 14.136 | 0.162                           | 2.221 | 0.568 | -0.113 | 13.868 |
| 0.5          | 52.01    | 0.048                          | 1.573 | 0.851 | -0.037 | 14.072 | 0.117                           | 2.285 | 0.679 | -0.089 | 13.873 |
| 0.6          | 52.38    | 0.030                          | 1.606 | 0.910 | -0.027 | 13.945 | 0.092                           | 2.321 | 0.744 | -0.076 | 13.723 |
| 0.8          | 52.81    | 0.014                          | 1.643 | 0.972 | -0.020 | 13.911 | 0.063                           | 2.291 | 0.832 | -0.059 | 13.622 |
| 1            | 52.96    | 0.007                          | 1.649 | 1.005 | -0.019 | 13.347 | 0.047                           | 2.221 | 0.882 | -0.051 | 13.513 |
| 1.5          | 50.32    | -0.020                         | 1.568 | 1.120 | -0.005 | 14.268 | 0.006                           | 1.921 | 1.030 | -0.025 | 13.654 |
| 2            | 42.16    | -0.021                         | 1.600 | 1.127 | -0.005 | 12.631 | 0.002                           | 1.850 | 1.047 | -0.025 | 13.071 |
| 3            | 30.92    | -0.003                         | 1.607 | 1.060 | -0.017 | 12.319 | 0.007                           | 1.681 | 1.026 | -0.024 | 12.432 |
| 4            | 27.04    | 0.006                          | 1.550 | 1.025 | -0.021 | 12.926 | 0.013                           | 1.557 | 1.003 | -0.029 | 13.996 |
| 5            | 25.31    | 0.012                          | 1.486 | 1.006 | -0.026 | 13.129 | 0.024                           | 1.478 | 0.968 | -0.038 | 14.185 |
| 6            | 24.33    | 0.023                          | 1.446 | 0.975 | -0.034 | 13.325 | 0.025                           | 1.403 | 0.969 | -0.038 | 13.992 |
| 8            | 23.32    | 0.030                          | 1.363 | 0.961 | -0.040 | 13.596 | 0.034                           | 1.312 | 0.947 | -0.041 | 13.328 |
| 10           | 22.86    | 0.040                          | 1.305 | 0.942 | -0.049 | 13.788 | 0.042                           | 1.254 | 0.931 | -0.050 | 14.093 |
| 15           | 22.48    | 0.050                          | 1.210 | 0.934 | -0.057 | 14.115 | 0.040                           | 1.159 | 0.956 | -0.045 | 14.541 |

**Table S4.** Equivalent atomic numbers, G–P fitting parameters for EBF and EABF, respectively, for glass C2.

| Energy (MeV) | $Z_{eq}$ | G–P fitting parameters for EBF |       |       |        |        | G–P fitting parameters for EABF |       |       |        |        |
|--------------|----------|--------------------------------|-------|-------|--------|--------|---------------------------------|-------|-------|--------|--------|
|              |          | a                              | b     | c     | d      | $X_k$  | a                               | b     | c     | d      | $X_k$  |
| 0.015        | 24.5     | -0.42                          | 1.005 | 1.343 | 0.302  | 5.9228 | -0.42                           | 1.005 | 1.341 | 0.298  | 6.5302 |
| 0.02         | 29.24    | 0.747                          | 1.044 | 0.146 | -1.038 | 10.836 | 0.433                           | 1.011 | 0.271 | -0.499 | 12.733 |
| 0.03         | 30.34    | 0.193                          | 1.339 | 0.448 | -0.071 | 14.451 | 0.23                            | 1.077 | 0.459 | -0.17  | 13.299 |
| 0.04         | 31.11    | 0.21                           | 1.591 | 0.328 | -0.084 | 16.138 | 0.18                            | 1.123 | 0.378 | -0.242 | 25.028 |
| 0.05         | 31.69    | 0.109                          | 1.56  | 0.277 | -0.094 | 12.667 | 0.148                           | 1.146 | 0.281 | -0.078 | 11.789 |
| 0.06         | 32.17    | 0.48                           | 1.473 | 0.263 | -0.139 | 14.656 | 0.404                           | 1.179 | 0.251 | -0.162 | 14.637 |
| 0.08         | 32.93    | 0.39                           | 1.351 | 0.304 | -0.16  | 14.118 | 0.339                           | 1.265 | 0.287 | -0.159 | 14.27  |
| 0.1          | 54.7     | 0.669                          | 1.447 | 0.044 | -0.215 | 14.25  | 0.646                           | 1.417 | 0.051 | -0.227 | 14.007 |
| 0.15         | 56.7     | 0.358                          | 1.195 | 0.24  | -0.204 | 13.748 | 0.544                           | 1.429 | 0.112 | -0.286 | 13.754 |
| 0.2          | 57.86    | 0.199                          | 1.189 | 0.442 | -0.107 | 14.197 | 0.406                           | 1.514 | 0.203 | -0.232 | 13.83  |
| 0.3          | 59.22    | 0.135                          | 1.283 | 0.568 | -0.063 | 13.83  | 0.286                           | 1.759 | 0.329 | -0.163 | 13.487 |
| 0.4          | 60.02    | 0.092                          | 1.374 | 0.693 | -0.052 | 14.169 | 0.217                           | 1.99  | 0.453 | -0.143 | 13.824 |
| 0.5          | 60.53    | 0.068                          | 1.439 | 0.772 | -0.042 | 14.126 | 0.164                           | 2.06  | 0.562 | -0.113 | 13.864 |
| 0.6          | 60.87    | 0.051                          | 1.482 | 0.828 | -0.034 | 13.776 | 0.126                           | 2.067 | 0.646 | -0.09  | 13.682 |
| 0.8          | 61.25    | 0.032                          | 1.537 | 0.895 | -0.026 | 13.679 | 0.091                           | 2.118 | 0.739 | -0.072 | 13.604 |
| 1            | 61.4     | 0.02                           | 1.554 | 0.945 | -0.022 | 13.42  | 0.072                           | 2.105 | 0.797 | -0.063 | 13.517 |
| 1.5          | 59.6     | -0                             | 1.521 | 1.053 | -0.013 | 13.782 | 0.041                           | 1.967 | 0.911 | -0.051 | 13.594 |
| 2            | 54.02    | -0.01                          | 1.554 | 1.07  | -0.017 | 13.088 | 0.04                            | 1.93  | 0.93  | -0.055 | 13.238 |
| 3            | 43.67    | 9E-04                          | 1.549 | 1.063 | -0.029 | 12.874 | 0.037                           | 1.718 | 0.949 | -0.06  | 13.223 |
| 4            | 38.85    | 0.015                          | 1.514 | 1.023 | -0.039 | 13.267 | 0.045                           | 1.588 | 0.929 | -0.065 | 13.638 |
| 5            | 36.45    | 0.034                          | 1.504 | 0.967 | -0.055 | 13.464 | 0.059                           | 1.524 | 0.894 | -0.077 | 13.921 |
| 6            | 35.09    | 0.04                           | 1.464 | 0.957 | -0.059 | 13.534 | 0.061                           | 1.449 | 0.895 | -0.077 | 14.146 |
| 8            | 33.6     | 0.055                          | 1.424 | 0.927 | -0.072 | 13.758 | 0.066                           | 1.365 | 0.893 | -0.079 | 14.145 |
| 10           | 32.84    | 0.048                          | 1.361 | 0.963 | -0.065 | 14.011 | 0.056                           | 1.289 | 0.931 | -0.07  | 14.337 |
| 15           | 32.28    | 0.047                          | 1.302 | 1.012 | -0.063 | 14.387 | 0.059                           | 1.218 | 0.965 | -0.07  | 14.657 |



**Table S5.** Equivalent atomic numbers, G–P fitting parameters for EBF and EABF, respectively, for glass C3.

| Energy (MeV) | $Z_{eq}$ | G–P fitting parameters for EBF |       |       |        |        | G–P fitting parameters for EABF |       |       |        |        |
|--------------|----------|--------------------------------|-------|-------|--------|--------|---------------------------------|-------|-------|--------|--------|
|              |          | a                              | b     | c     | d      | $X_k$  | a                               | b     | c     | d      | $X_k$  |
| 0.015        | 28.41    | -0.36                          | 1.002 | 1.953 | 0.2709 | 10.099 | -0.36                           | 1.002 | 1.953 | 0.271  | 10.099 |
| 0.02         | 34.16    | 0.436                          | 1.694 | 0.954 | -0.597 | 11.895 | 0.255                           | 1.104 | 1.033 | -0.288 | 15.057 |
| 0.03         | 35.14    | 0.155                          | 2.379 | 0.739 | -0.137 | 22.438 | 0.174                           | 1.275 | 0.748 | -0.147 | 19.941 |
| 0.04         | 35.81    | 0.153                          | 2.694 | 0.325 | -0.06  | 19.532 | 0.146                           | 1.295 | 0.351 | -0.15  | 24.179 |
| 0.05         | 36.34    | -0.1                           | 2.313 | 0.161 | -0.021 | 12.323 | 0.001                           | 1.261 | 0.17  | 0.019  | 10.094 |
| 0.06         | 36.78    | 0.793                          | 1.942 | 0.133 | -0.143 | 16.093 | 0.602                           | 1.253 | 0.137 | -0.176 | 14.774 |
| 0.08         | 37.47    | 0.59                           | 1.516 | 0.16  | -0.211 | 14.268 | 0.463                           | 1.283 | 0.178 | -0.196 | 14.148 |
| 0.1          | 63.24    | 0.062                          | 1.602 | 0.22  | 0.0373 | 18.826 | 0.06                            | 1.623 | 0.217 | 0.033  | 17.938 |
| 0.15         | 64.98    | 0.46                           | 1.204 | 0.149 | -0.242 | 13.965 | 0.64                            | 1.48  | 0.065 | -0.282 | 15.094 |
| 0.2          | 65.96    | 0.253                          | 1.158 | 0.36  | -0.137 | 14.076 | 0.516                           | 1.492 | 0.129 | -0.274 | 13.799 |
| 0.3          | 67.07    | 0.151                          | 1.213 | 0.526 | -0.071 | 13.749 | 0.342                           | 1.625 | 0.26  | -0.191 | 13.357 |
| 0.4          | 67.72    | 0.108                          | 1.287 | 0.643 | -0.058 | 14.195 | 0.261                           | 1.801 | 0.378 | -0.167 | 13.753 |
| 0.5          | 68.13    | 0.085                          | 1.351 | 0.713 | -0.048 | 14.141 | 0.208                           | 1.923 | 0.471 | -0.138 | 13.803 |
| 0.6          | 68.4     | 0.068                          | 1.394 | 0.764 | -0.04  | 13.723 | 0.15                            | 1.857 | 0.579 | -0.1   | 13.623 |
| 0.8          | 68.7     | 0.047                          | 1.455 | 0.835 | -0.031 | 13.7   | 0.114                           | 1.951 | 0.67  | -0.08  | 13.59  |
| 1            | 68.83    | 0.033                          | 1.481 | 0.891 | -0.025 | 13.43  | 0.093                           | 1.969 | 0.732 | -0.072 | 13.52  |
| 1.5          | 67.68    | 0.007                          | 1.466 | 1.005 | -0.019 | 14.122 | 0.051                           | 1.857 | 0.872 | -0.054 | 13.746 |
| 2            | 64       | 0.001                          | 1.496 | 1.042 | -0.019 | 13.15  | 0.06                            | 1.884 | 0.865 | -0.069 | 13.37  |
| 3            | 56.13    | 0.017                          | 1.541 | 1.015 | -0.043 | 13.343 | 0.087                           | 1.887 | 0.817 | -0.106 | 13.464 |
| 4            | 51.44    | 0.021                          | 1.481 | 1.021 | -0.048 | 13.497 | 0.073                           | 1.63  | 0.864 | -0.095 | 13.685 |
| 5            | 48.8     | 0.046                          | 1.494 | 0.955 | -0.073 | 13.676 | 0.091                           | 1.56  | 0.826 | -0.112 | 13.875 |
| 6            | 47.28    | 0.058                          | 1.485 | 0.929 | -0.083 | 13.888 | 0.104                           | 1.513 | 0.801 | -0.123 | 14.068 |
| 8            | 45.5     | 0.078                          | 1.528 | 0.894 | -0.098 | 14.155 | 0.111                           | 1.479 | 0.8   | -0.127 | 14.313 |
| 10           | 44.57    | 0.055                          | 1.503 | 0.988 | -0.076 | 14.2   | 0.086                           | 1.415 | 0.89  | -0.102 | 14.33  |
| 15           | 43.75    | 0.033                          | 1.577 | 1.139 | -0.059 | 14.102 | 0.062                           | 1.408 | 1.033 | -0.086 | 14.236 |

**Table S6.** Equivalent atomic numbers, G–P fitting parameters for EBF and EABF, respectively, for glass C4.

| Energy (MeV) | $Z_{eq}$ | G–P fitting parameters for EBF |       |       |        |        | G–P fitting parameters for EABF |       |       |        |        |
|--------------|----------|--------------------------------|-------|-------|--------|--------|---------------------------------|-------|-------|--------|--------|
|              |          | a                              | b     | c     | d      | $X_k$  | a                               | b     | c     | d      | $X_k$  |
| 0.015        | 30.99    | -0.214                         | 1.002 | 1.743 | 0.1872 | 11.414 | -0.22                           | 1.002 | 1.746 | 0.192  | 11.726 |
| 0.02         | 37.46    | 0.252                          | 2.078 | 1.433 | -0.336 | 12.522 | 0.15                            | 1.159 | 1.484 | -0.163 | 16.432 |
| 0.03         | 38.18    | 0.134                          | 2.967 | 0.903 | -0.175 | 26.956 | 0.142                           | 1.386 | 0.912 | -0.134 | 23.699 |
| 0.04         | 38.68    | 0.122                          | 3.297 | 0.324 | -0.046 | 21.39  | 0.127                           | 1.389 | 0.336 | -0.099 | 23.715 |
| 0.05         | 39.1     | -0.209                         | 2.715 | 0.099 | 0.0178 | 12.14  | -0.08                           | 1.323 | 0.11  | 0.071  | 9.1865 |
| 0.06         | 39.47    | 0.958                          | 2.19  | 0.064 | -0.146 | 16.853 | 0.707                           | 1.293 | 0.076 | -0.184 | 14.846 |
| 0.08         | 40.07    | 0.694                          | 1.601 | 0.085 | -0.237 | 14.345 | 0.528                           | 1.293 | 0.121 | -0.215 | 14.084 |
| 0.1          | 68.09    | 0.064                          | 1.68  | 0.508 | -0.023 | 17.859 | 0.068                           | 1.706 | 0.492 | -0.027 | 17.499 |
| 0.15         | 69.57    | 0.404                          | 1.23  | 0.147 | -0.159 | 14.571 | 0.468                           | 1.54  | 0.087 | -0.143 | 19.905 |
| 0.2          | 70.37    | 0.306                          | 1.156 | 0.297 | -0.171 | 13.853 | 0.581                           | 1.509 | 0.098 | -0.29  | 13.884 |
| 0.3          | 71.28    | 0.162                          | 1.186 | 0.502 | -0.077 | 13.669 | 0.375                           | 1.584 | 0.225 | -0.208 | 13.328 |
| 0.4          | 71.8     | 0.118                          | 1.252 | 0.615 | -0.062 | 14.159 | 0.283                           | 1.72  | 0.344 | -0.179 | 13.725 |
| 0.5          | 72.13    | 0.094                          | 1.311 | 0.685 | -0.052 | 14.134 | 0.227                           | 1.833 | 0.434 | -0.148 | 13.759 |
| 0.6          | 72.34    | 0.077                          | 1.354 | 0.734 | -0.043 | 13.699 | 0.161                           | 1.756 | 0.549 | -0.104 | 13.592 |
| 0.8          | 72.59    | 0.054                          | 1.416 | 0.807 | -0.033 | 13.707 | 0.124                           | 1.864 | 0.638 | -0.084 | 13.583 |
| 1            | 72.69    | 0.04                           | 1.447 | 0.862 | -0.028 | 13.362 | 0.102                           | 1.896 | 0.702 | -0.075 | 13.528 |
| 1.5          | 71.89    | 0.011                          | 1.436 | 0.986 | -0.02  | 14.242 | 0.056                           | 1.808 | 0.851 | -0.055 | 13.816 |
| 2            | 69.28    | 0.004                          | 1.459 | 1.026 | -0.02  | 13.286 | 0.063                           | 1.819 | 0.852 | -0.069 | 13.408 |
| 3            | 63.31    | 0.018                          | 1.493 | 1.014 | -0.044 | 13.272 | 0.093                           | 1.797 | 0.801 | -0.111 | 13.526 |
| 4            | 59.37    | 0.036                          | 1.503 | 0.976 | -0.06  | 13.74  | 0.109                           | 1.744 | 0.775 | -0.126 | 13.857 |
| 5            | 56.96    | 0.07                           | 1.61  | 0.888 | -0.089 | 13.959 | 0.145                           | 1.853 | 0.701 | -0.159 | 14.109 |
| 6            | 55.54    | 0.073                          | 1.616 | 0.894 | -0.09  | 14.136 | 0.138                           | 1.762 | 0.727 | -0.152 | 14.236 |
| 8            | 53.84    | 0.074                          | 1.707 | 0.922 | -0.094 | 14.171 | 0.122                           | 1.719 | 0.791 | -0.138 | 14.306 |
| 10           | 52.92    | 0.042                          | 1.683 | 1.061 | -0.065 | 14.128 | 0.086                           | 1.621 | 0.921 | -0.107 | 14.191 |
| 15           | 52.02    | 0.021                          | 1.769 | 1.24  | -0.051 | 13.841 | 0.056                           | 1.586 | 1.103 | -0.087 | 13.993 |



**Table S7.** Equivalent atomic numbers, G–P fitting parameters for EBF and EABF, respectively, for glass C5.

| Energy (MeV) | $Z_{eq}$ | G–P fitting parameters for EBF |       |       |        |        | G–P fitting parameters for EABF |       |       |        |        |
|--------------|----------|--------------------------------|-------|-------|--------|--------|---------------------------------|-------|-------|--------|--------|
|              |          | a                              | b     | c     | d      | $X_k$  | a                               | b     | c     | d      | $X_k$  |
| 0.015        | 31.66    | -0.18                          | 1.003 | 1.646 | 0.166  | 11.499 | -0.189                          | 1.003 | 1.65  | 0.1725 | 11.911 |
| 0.02         | 38.38    | 0.203                          | 2.18  | 1.559 | -0.267 | 12.688 | 0.123                           | 1.173 | 1.604 | -0.13  | 16.796 |
| 0.03         | 39.01    | 0.128                          | 3.119 | 0.946 | -0.184 | 28.126 | 0.134                           | 1.415 | 0.954 | -0.131 | 24.671 |
| 0.04         | 39.47    | 0.113                          | 3.455 | 0.323 | -0.043 | 21.873 | 0.122                           | 1.413 | 0.332 | -0.086 | 23.594 |
| 0.05         | 39.86    | -0.24                          | 2.822 | 0.082 | 0.028  | 12.091 | -0.098                          | 1.339 | 0.094 | 0.0848 | 8.9473 |
| 0.06         | 40.21    | 1.001                          | 2.256 | 0.046 | -0.146 | 17.053 | 0.735                           | 1.303 | 0.06  | -0.186 | 14.865 |
| 0.08         | 40.8     | 0.722                          | 1.624 | 0.065 | -0.244 | 14.366 | 0.545                           | 1.296 | 0.106 | -0.22  | 14.068 |
| 0.1          | 69.53    | 0.088                          | 1.701 | 0.598 | -0.052 | 17.362 | 0.093                           | 1.727 | 0.579 | -0.055 | 17.208 |
| 0.15         | 70.91    | 0.388                          | 1.237 | 0.146 | -0.136 | 14.741 | 0.42                            | 1.557 | 0.093 | -0.105 | 21.25  |
| 0.2          | 71.67    | 0.321                          | 1.156 | 0.279 | -0.18  | 13.79  | 0.599                           | 1.513 | 0.089 | -0.294 | 13.908 |
| 0.3          | 72.51    | 0.164                          | 1.179 | 0.495 | -0.079 | 13.647 | 0.385                           | 1.573 | 0.215 | -0.213 | 13.32  |
| 0.4          | 72.98    | 0.121                          | 1.242 | 0.607 | -0.064 | 14.149 | 0.289                           | 1.697 | 0.334 | -0.182 | 13.717 |
| 0.5          | 73.28    | 0.097                          | 1.3   | 0.677 | -0.053 | 14.131 | 0.232                           | 1.808 | 0.424 | -0.151 | 13.747 |
| 0.6          | 73.49    | 0.079                          | 1.343 | 0.726 | -0.043 | 13.693 | 0.165                           | 1.728 | 0.541 | -0.105 | 13.584 |
| 0.8          | 73.71    | 0.056                          | 1.405 | 0.799 | -0.033 | 13.709 | 0.127                           | 1.84  | 0.629 | -0.085 | 13.581 |
| 1            | 73.8     | 0.042                          | 1.438 | 0.854 | -0.028 | 13.343 | 0.105                           | 1.876 | 0.693 | -0.076 | 13.53  |
| 1.5          | 73.07    | 0.012                          | 1.427 | 0.981 | -0.02  | 14.275 | 0.058                           | 1.794 | 0.845 | -0.056 | 13.835 |
| 2            | 70.72    | 0.005                          | 1.449 | 1.021 | -0.02  | 13.322 | 0.063                           | 1.802 | 0.849 | -0.069 | 13.418 |
| 3            | 65.24    | 0.017                          | 1.477 | 1.015 | -0.043 | 13.281 | 0.092                           | 1.768 | 0.803 | -0.11  | 13.531 |
| 4            | 61.48    | 0.034                          | 1.486 | 0.981 | -0.058 | 13.74  | 0.106                           | 1.7   | 0.781 | -0.124 | 13.863 |
| 5            | 59.16    | 0.068                          | 1.586 | 0.897 | -0.087 | 13.966 | 0.142                           | 1.795 | 0.709 | -0.157 | 14.123 |
| 6            | 57.75    | 0.075                          | 1.64  | 0.888 | -0.091 | 14.187 | 0.144                           | 1.801 | 0.713 | -0.156 | 14.273 |
| 8            | 56.08    | 0.073                          | 1.807 | 0.927 | -0.092 | 14.178 | 0.127                           | 1.853 | 0.781 | -0.143 | 14.287 |
| 10           | 55.16    | 0.038                          | 1.815 | 1.081 | -0.061 | 14.09  | 0.087                           | 1.77  | 0.926 | -0.109 | 14.117 |
| 15           | 54.23    | 0.015                          | 1.957 | 1.275 | -0.046 | 13.767 | 0.053                           | 1.769 | 1.125 | -0.086 | 13.892 |

**Table S8.** Equivalent atomic numbers, G–P fitting parameters for EBF and EABF, respectively, for glass C6.

| Energy (MeV) | $Z_{eq}$ | G–P fitting parameters for EBF |       |       |        |        | G–P fitting parameters for EABF |       |       |        |        |
|--------------|----------|--------------------------------|-------|-------|--------|--------|---------------------------------|-------|-------|--------|--------|
|              |          | a                              | b     | c     | d      | $X_k$  | a                               | b     | c     | d      | $X_k$  |
| 0.015        | 33.66    | -0.096                         | 1.004 | 1.369 | 0.1069 | 11.741 | -0.105                          | 1.004 | 1.375 | 0.117  | 12.441 |
| 0.02         | 41.01    | 0.071                          | 2.456 | 1.902 | -0.08  | 13.137 | 0.0473                          | 1.213 | 1.928 | -0.041 | 17.782 |
| 0.03         | 41.19    | 0.114                          | 3.504 | 1.053 | -0.209 | 31.076 | 0.1134                          | 1.488 | 1.061 | -0.122 | 27.125 |
| 0.04         | 41.48    | 0.093                          | 3.844 | 0.322 | -0.034 | 23.072 | 0.11                            | 1.474 | 0.322 | -0.053 | 23.294 |
| 0.05         | 41.78    | -0.309                         | 3.08  | 0.042 | 0.053  | 11.973 | -0.148                          | 1.379 | 0.056 | 0.118  | 8.3655 |
| 0.06         | 42.06    | 1.093                          | 2.413 | 0.006 | -0.147 | 17.412 | 0.7915                          | 1.329 | 0.025 | -0.189 | 14.964 |
| 0.08         | 42.57    | 0.77                           | 1.672 | 0.032 | -0.248 | 14.481 | 0.5853                          | 1.307 | 0.077 | -0.228 | 14.055 |
| 0.1          | 72.9     | 0.143                          | 1.749 | 0.802 | -0.116 | 16.237 | 0.1499                          | 1.775 | 0.774 | -0.119 | 16.549 |
| 0.15         | 74.04    | 0.353                          | 1.254 | 0.146 | -0.084 | 15.13  | 0.3129                          | 1.595 | 0.108 | -0.018 | 24.278 |
| 0.2          | 74.65    | 0.354                          | 1.159 | 0.24  | -0.196 | 13.717 | 0.6189                          | 1.527 | 0.074 | -0.285 | 14.245 |
| 0.3          | 75.31    | 0.174                          | 1.166 | 0.476 | -0.085 | 13.598 | 0.4097                          | 1.554 | 0.193 | -0.224 | 13.305 |
| 0.4          | 75.69    | 0.126                          | 1.224 | 0.592 | -0.066 | 14.151 | 0.3056                          | 1.66  | 0.312 | -0.192 | 13.686 |
| 0.5          | 75.92    | 0.101                          | 1.278 | 0.663 | -0.054 | 14.147 | 0.2452                          | 1.763 | 0.402 | -0.159 | 13.723 |
| 0.6          | 76.07    | 0.082                          | 1.319 | 0.712 | -0.044 | 13.714 | 0.17                            | 1.672 | 0.526 | -0.107 | 13.572 |
| 0.8          | 76.25    | 0.059                          | 1.381 | 0.786 | -0.033 | 13.704 | 0.1341                          | 1.791 | 0.61  | -0.087 | 13.565 |
| 1            | 76.31    | 0.045                          | 1.415 | 0.84  | -0.028 | 13.439 | 0.1107                          | 1.833 | 0.675 | -0.078 | 13.524 |
| 1.5          | 75.79    | 0.015                          | 1.409 | 0.969 | -0.021 | 14.382 | 0.063                           | 1.769 | 0.828 | -0.058 | 13.883 |
| 2            | 74.09    | 0.007                          | 1.427 | 1.012 | -0.02  | 13.401 | 0.0652                          | 1.764 | 0.841 | -0.069 | 13.441 |
| 3            | 69.99    | 0.016                          | 1.437 | 1.02  | -0.041 | 13.359 | 0.0893                          | 1.707 | 0.808 | -0.106 | 13.536 |
| 4            | 66.94    | 0.028                          | 1.434 | 1.002 | -0.053 | 13.734 | 0.1028                          | 1.617 | 0.792 | -0.12  | 13.864 |
| 5            | 64.99    | 0.062                          | 1.518 | 0.92  | -0.082 | 13.976 | 0.1339                          | 1.652 | 0.73  | -0.149 | 14.149 |
| 6            | 63.76    | 0.069                          | 1.566 | 0.914 | -0.087 | 14.161 | 0.1353                          | 1.637 | 0.739 | -0.149 | 14.299 |
| 8            | 62.29    | 0.068                          | 1.754 | 0.957 | -0.087 | 14.142 | 0.1213                          | 1.708 | 0.805 | -0.139 | 14.28  |
| 10           | 61.48    | 0.034                          | 1.836 | 1.117 | -0.059 | 13.995 | 0.0805                          | 1.691 | 0.96  | -0.104 | 14.112 |
| 15           | 60.61    | 0.006                          | 2.085 | 1.338 | -0.038 | 13.696 | 0.0278                          | 2.089 | 1.238 | -0.061 | 13.722 |



**Table S9.** Equivalent atomic numbers, G–P fitting parameters for EBF and EABF, respectively, for glass S1.

| Energy (MeV) | $Z_{eq}$ | G–P fitting parameters for EBF |       |       |        |        | G–P fitting parameters for EABF |       |       |        |        |
|--------------|----------|--------------------------------|-------|-------|--------|--------|---------------------------------|-------|-------|--------|--------|
|              |          | a                              | b     | c     | d      | $X_k$  | a                               | b     | c     | d      | $X_k$  |
| 0.015        | 20.61    | -0.04                          | 1.007 | 0.706 | 0.155  | 6.8667 | -0.03                           | 1.007 | 0.696 | 0.1388 | 9.2494 |
| 0.02         | 28.68    | 0.75                           | 1.009 | 0.106 | -1.017 | 10.841 | 0.43                            | 1.006 | 0.233 | -0.488 | 13.174 |
| 0.03         | 29.68    | 0.199                          | 1.184 | 0.405 | -0.061 | 13.262 | 0.238                           | 1.048 | 0.416 | -0.173 | 12.309 |
| 0.04         | 30.34    | 0.221                          | 1.396 | 0.329 | -0.088 | 15.541 | 0.186                           | 1.093 | 0.383 | -0.259 | 25.177 |
| 0.05         | 30.82    | 0.151                          | 1.406 | 0.301 | -0.108 | 12.737 | 0.178                           | 1.122 | 0.303 | -0.097 | 12.134 |
| 0.06         | 31.2     | 0.408                          | 1.365 | 0.293 | -0.137 | 14.325 | 0.358                           | 1.162 | 0.277 | -0.158 | 14.605 |
| 0.08         | 31.78    | 0.334                          | 1.306 | 0.344 | -0.146 | 14.076 | 0.305                           | 1.259 | 0.317 | -0.149 | 14.303 |
| 0.1          | 46.18    | 0.507                          | 1.288 | 0.167 | -0.246 | 13.772 | 0.508                           | 1.272 | 0.153 | -0.272 | 13.583 |
| 0.15         | 47.93    | 0.254                          | 1.224 | 0.366 | -0.14  | 14.064 | 0.394                           | 1.44  | 0.215 | -0.217 | 13.918 |
| 0.2          | 48.98    | 0.171                          | 1.286 | 0.502 | -0.093 | 14.581 | 0.325                           | 1.701 | 0.286 | -0.192 | 13.933 |
| 0.3          | 50.26    | 0.107                          | 1.401 | 0.644 | -0.051 | 14.214 | 0.208                           | 1.913 | 0.452 | -0.118 | 13.809 |
| 0.4          | 51.02    | 0.068                          | 1.513 | 0.776 | -0.044 | 14.137 | 0.159                           | 2.232 | 0.574 | -0.112 | 13.868 |
| 0.5          | 51.52    | 0.047                          | 1.582 | 0.855 | -0.037 | 14.069 | 0.114                           | 2.304 | 0.686 | -0.088 | 13.872 |
| 0.6          | 51.86    | 0.029                          | 1.614 | 0.915 | -0.026 | 13.961 | 0.09                            | 2.337 | 0.75  | -0.075 | 13.724 |
| 0.8          | 52.24    | 0.013                          | 1.651 | 0.977 | -0.02  | 13.946 | 0.061                           | 2.302 | 0.839 | -0.058 | 13.623 |
| 1            | 52.37    | 0.006                          | 1.656 | 1.01  | -0.018 | 13.363 | 0.045                           | 2.229 | 0.888 | -0.05  | 13.511 |
| 1.5          | 50.15    | -0.02                          | 1.569 | 1.121 | -0.005 | 14.285 | 0.005                           | 1.919 | 1.032 | -0.025 | 13.657 |
| 2            | 43.54    | -0.02                          | 1.592 | 1.123 | -0.006 | 12.719 | 0.006                           | 1.85  | 1.037 | -0.027 | 13.08  |
| 3            | 34.46    | -0                             | 1.589 | 1.062 | -0.021 | 12.503 | 0.016                           | 1.695 | 1.001 | -0.036 | 12.708 |
| 4            | 31.14    | 0.01                           | 1.538 | 1.022 | -0.029 | 13.005 | 0.018                           | 1.553 | 0.995 | -0.037 | 13.972 |
| 5            | 29.62    | 0.017                          | 1.481 | 1.004 | -0.033 | 13.279 | 0.023                           | 1.458 | 0.984 | -0.041 | 14.129 |
| 6            | 28.72    | 0.021                          | 1.429 | 0.994 | -0.037 | 13.242 | 0.023                           | 1.382 | 0.983 | -0.039 | 14.303 |
| 8            | 27.81    | 0.035                          | 1.353 | 0.965 | -0.05  | 13.558 | 0.035                           | 1.293 | 0.959 | -0.048 | 14.031 |
| 10           | 27.37    | 0.042                          | 1.293 | 0.955 | -0.057 | 13.942 | 0.039                           | 1.231 | 0.958 | -0.051 | 14.298 |
| 15           | 27.04    | 0.05                           | 1.196 | 0.961 | -0.061 | 14.409 | 0.051                           | 1.146 | 0.951 | -0.057 | 14.694 |

**Table S10.** Equivalent atomic numbers, G–P fitting parameters for EBF and EABF, respectively, for glass S2.

| Energy (MeV) | $Z_{eq}$ | G–P fitting parameters for EBF |       |       |        |        | G–P fitting parameters for EABF |       |       |        |        |
|--------------|----------|--------------------------------|-------|-------|--------|--------|---------------------------------|-------|-------|--------|--------|
|              |          | a                              | b     | c     | d      | $X_k$  | a                               | b     | c     | d      | $X_k$  |
| 0.015        | 26.29    | -0.53                          | 1.004 | 1.61  | 0.342  | 6.1687 | -0.53                           | 1.004 | 1.61  | 0.3421 | 6.1687 |
| 0.02         | 32.83    | 0.516                          | 1.527 | 0.747 | -0.71  | 11.623 | 0.301                           | 1.08  | 0.837 | -0.342 | 14.46  |
| 0.03         | 33.83    | 0.165                          | 2.111 | 0.664 | -0.12  | 20.381 | 0.188                           | 1.224 | 0.674 | -0.153 | 18.23  |
| 0.04         | 34.55    | 0.168                          | 2.414 | 0.326 | -0.066 | 18.67  | 0.154                           | 1.251 | 0.358 | -0.173 | 24.395 |
| 0.05         | 35.07    | -0.04                          | 2.116 | 0.191 | -0.04  | 12.413 | 0.039                           | 1.231 | 0.199 | -0.006 | 10.536 |
| 0.06         | 35.5     | 0.71                           | 1.818 | 0.167 | -0.142 | 15.713 | 0.55                            | 1.233 | 0.167 | -0.172 | 14.737 |
| 0.08         | 36.18    | 0.536                          | 1.471 | 0.199 | -0.197 | 14.227 | 0.43                            | 1.278 | 0.207 | -0.186 | 14.181 |
| 0.1          | 59.06    | 0.456                          | 1.515 | 0.101 | -0.097 | 15.954 | 0.441                           | 1.511 | 0.103 | -0.098 | 15.532 |
| 0.15         | 60.89    | 0.425                          | 1.196 | 0.186 | -0.237 | 13.791 | 0.623                           | 1.451 | 0.081 | -0.302 | 13.904 |
| 0.2          | 61.93    | 0.219                          | 1.169 | 0.406 | -0.117 | 14.186 | 0.46                            | 1.494 | 0.163 | -0.256 | 13.783 |
| 0.3          | 63.14    | 0.142                          | 1.242 | 0.548 | -0.065 | 13.814 | 0.311                           | 1.675 | 0.294 | -0.176 | 13.399 |
| 0.4          | 63.84    | 0.099                          | 1.323 | 0.67  | -0.053 | 14.228 | 0.239                           | 1.883 | 0.413 | -0.155 | 13.782 |
| 0.5          | 64.3     | 0.077                          | 1.391 | 0.742 | -0.045 | 14.149 | 0.189                           | 2.015 | 0.508 | -0.127 | 13.846 |
| 0.6          | 64.6     | 0.059                          | 1.435 | 0.795 | -0.036 | 13.746 | 0.139                           | 1.959 | 0.609 | -0.096 | 13.655 |
| 0.8          | 64.95    | 0.04                           | 1.495 | 0.864 | -0.028 | 13.692 | 0.103                           | 2.039 | 0.703 | -0.077 | 13.598 |
| 1            | 65.07    | 0.025                          | 1.517 | 0.92  | -0.023 | 13.499 | 0.083                           | 2.045 | 0.763 | -0.068 | 13.512 |
| 1.5          | 63.68    | 0.002                          | 1.497 | 1.025 | -0.017 | 13.994 | 0.046                           | 1.907 | 0.892 | -0.052 | 13.674 |
| 2            | 59.29    | 0.002                          | 1.534 | 1.043 | -0.021 | 13.104 | 0.056                           | 1.952 | 0.879 | -0.068 | 13.337 |
| 3            | 50.61    | 0.005                          | 1.525 | 1.053 | -0.034 | 13.027 | 0.051                           | 1.731 | 0.913 | -0.075 | 13.29  |
| 4            | 45.88    | 0.016                          | 1.487 | 1.029 | -0.044 | 13.395 | 0.059                           | 1.592 | 0.898 | -0.081 | 13.581 |
| 5            | 43.41    | 0.046                          | 1.514 | 0.945 | -0.071 | 13.609 | 0.086                           | 1.568 | 0.831 | -0.104 | 13.801 |
| 6            | 42.01    | 0.057                          | 1.497 | 0.921 | -0.08  | 13.82  | 0.096                           | 1.514 | 0.811 | -0.113 | 14     |
| 8            | 40.38    | 0.076                          | 1.512 | 0.887 | -0.094 | 14.081 | 0.103                           | 1.46  | 0.81  | -0.117 | 14.265 |
| 10           | 39.54    | 0.056                          | 1.467 | 0.965 | -0.075 | 14.161 | 0.08                            | 1.383 | 0.891 | -0.094 | 14.347 |
| 15           | 38.87    | 0.039                          | 1.493 | 1.087 | -0.061 | 14.227 | 0.062                           | 1.351 | 1.003 | -0.08  | 14.391 |

**Table S11.** Equivalent atomic numbers, G–P fitting parameters for EBF and EABF, respectively, for glass S3.

| Energy (MeV) | $Z_{eq}$ | G–P fitting parameters for EBF |       |       |        |        | G–P fitting parameters for EABF |       |       |        |        |
|--------------|----------|--------------------------------|-------|-------|--------|--------|---------------------------------|-------|-------|--------|--------|
|              |          | a                              | b     | c     | d      | $X_k$  | a                               | b     | c     | d      | $X_k$  |
| 0.015        | 29.34    | -0.29                          | 1.001 | 1.991 | 0.2405 | 11.196 | -0.29                           | 1.001 | 1.991 | 0.241  | 11.251 |
| 0.02         | 36.04    | 0.329                          | 1.917 | 1.232 | -0.446 | 12.259 | 0.194                           | 1.136 | 1.295 | -0.215 | 15.856 |
| 0.03         | 36.91    | 0.142                          | 2.727 | 0.836 | -0.16  | 25.114 | 0.155                           | 1.341 | 0.845 | -0.139 | 22.167 |
| 0.04         | 37.5     | 0.134                          | 3.055 | 0.324 | -0.052 | 20.643 | 0.135                           | 1.351 | 0.342 | -0.119 | 23.902 |
| 0.05         | 37.97    | -0.16                          | 2.553 | 0.124 | 0.0022 | 12.214 | -0.05                           | 1.298 | 0.134 | 0.05   | 9.5515 |
| 0.06         | 38.36    | 0.891                          | 2.09  | 0.092 | -0.145 | 16.547 | 0.665                           | 1.277 | 0.101 | -0.181 | 14.817 |
| 0.08         | 39       | 0.652                          | 1.567 | 0.116 | -0.227 | 14.314 | 0.502                           | 1.289 | 0.144 | -0.207 | 14.11  |
| 0.1          | 65.31    | 0.016                          | 1.638 | 0.329 | 0.0332 | 18.848 | 0.017                           | 1.664 | 0.321 | 0.028  | 18.078 |
| 0.15         | 66.93    | 0.436                          | 1.215 | 0.148 | -0.206 | 14.227 | 0.566                           | 1.506 | 0.074 | -0.222 | 17.174 |
| 0.2          | 67.82    | 0.276                          | 1.157 | 0.333 | -0.152 | 13.98  | 0.544                           | 1.499 | 0.116 | -0.281 | 13.836 |
| 0.3          | 68.84    | 0.156                          | 1.201 | 0.515 | -0.074 | 13.715 | 0.356                           | 1.608 | 0.245 | -0.198 | 13.345 |
| 0.4          | 69.42    | 0.112                          | 1.272 | 0.631 | -0.06  | 14.18  | 0.27                            | 1.766 | 0.363 | -0.172 | 13.741 |
| 0.5          | 69.79    | 0.089                          | 1.334 | 0.701 | -0.05  | 14.138 | 0.216                           | 1.885 | 0.455 | -0.142 | 13.784 |
| 0.6          | 70.04    | 0.072                          | 1.377 | 0.752 | -0.041 | 13.713 | 0.155                           | 1.814 | 0.566 | -0.102 | 13.61  |
| 0.8          | 70.31    | 0.05                           | 1.439 | 0.823 | -0.031 | 13.703 | 0.118                           | 1.914 | 0.657 | -0.082 | 13.587 |
| 1            | 70.41    | 0.035                          | 1.467 | 0.879 | -0.026 | 13.402 | 0.096                           | 1.939 | 0.719 | -0.073 | 13.523 |
| 1.5          | 69.45    | 0.009                          | 1.453 | 0.997 | -0.019 | 14.173 | 0.053                           | 1.836 | 0.863 | -0.054 | 13.776 |
| 2            | 66.31    | 0.002                          | 1.479 | 1.035 | -0.019 | 13.211 | 0.061                           | 1.855 | 0.859 | -0.069 | 13.387 |
| 3            | 59.4     | 0.019                          | 1.523 | 1.011 | -0.044 | 13.344 | 0.092                           | 1.865 | 0.802 | -0.111 | 13.504 |
| 4            | 55.09    | 0.032                          | 1.509 | 0.987 | -0.057 | 13.659 | 0.098                           | 1.74  | 0.8   | -0.117 | 13.795 |
| 5            | 52.58    | 0.055                          | 1.536 | 0.931 | -0.079 | 13.793 | 0.112                           | 1.672 | 0.777 | -0.131 | 13.974 |
| 6            | 51.11    | 0.062                          | 1.508 | 0.925 | -0.085 | 13.965 | 0.114                           | 1.565 | 0.782 | -0.133 | 14.129 |
| 8            | 49.37    | 0.076                          | 1.525 | 0.91  | -0.098 | 14.159 | 0.112                           | 1.477 | 0.809 | -0.129 | 14.336 |
| 10           | 48.43    | 0.05                           | 1.504 | 1.021 | -0.072 | 14.185 | 0.085                           | 1.417 | 0.907 | -0.104 | 14.301 |
| 15           | 47.58    | 0.029                          | 1.587 | 1.182 | -0.058 | 13.981 | 0.06                            | 1.411 | 1.064 | -0.087 | 14.144 |



**Table S12.** Equivalent atomic numbers, G–P fitting parameters for EBF and EABF, respectively, for glass S4.

| Energy (MeV) | $Z_{eq}$ | G–P fitting parameters for EBF |       |       |        |        | G–P fitting parameters for EABF |       |       |        |        |
|--------------|----------|--------------------------------|-------|-------|--------|--------|---------------------------------|-------|-------|--------|--------|
|              |          | a                              | b     | c     | d      | $X_k$  | a                               | b     | c     | d      | $X_k$  |
| 0.015        | 31.4     | -0.195                         | 1.003 | 1.683 | 0.1744 | 11.466 | -0.2                            | 1.003 | 1.686 | 0.18   | 11.84  |
| 0.02         | 38.58    | 0.193                          | 2.201 | 1.586 | -0.253 | 12.722 | 0.117                           | 1.176 | 1.629 | -0.123 | 16.872 |
| 0.03         | 39.18    | 0.127                          | 3.15  | 0.954 | -0.186 | 28.357 | 0.132                           | 1.421 | 0.963 | -0.13  | 24.864 |
| 0.04         | 39.61    | 0.112                          | 3.483 | 0.323 | -0.042 | 21.962 | 0.121                           | 1.418 | 0.331 | -0.083 | 23.572 |
| 0.05         | 39.99    | -0.243                         | 2.84  | 0.08  | 0.0298 | 12.083 | -0.1                            | 1.342 | 0.092 | 0.087  | 8.9068 |
| 0.06         | 40.33    | 1.008                          | 2.266 | 0.043 | -0.146 | 17.085 | 0.739                           | 1.304 | 0.058 | -0.187 | 14.868 |
| 0.08         | 40.9     | 0.726                          | 1.627 | 0.063 | -0.245 | 14.369 | 0.547                           | 1.296 | 0.104 | -0.221 | 14.065 |
| 0.1          | 69.08    | 0.081                          | 1.694 | 0.57  | -0.043 | 17.514 | 0.085                           | 1.72  | 0.552 | -0.047 | 17.297 |
| 0.15         | 70.47    | 0.393                          | 1.234 | 0.146 | -0.144 | 14.686 | 0.436                           | 1.551 | 0.091 | -0.117 | 20.811 |
| 0.2          | 71.22    | 0.316                          | 1.156 | 0.285 | -0.177 | 13.812 | 0.593                           | 1.512 | 0.092 | -0.292 | 13.9   |
| 0.3          | 72.07    | 0.163                          | 1.181 | 0.497 | -0.078 | 13.655 | 0.381                           | 1.577 | 0.218 | -0.211 | 13.323 |
| 0.4          | 72.56    | 0.12                           | 1.246 | 0.61  | -0.063 | 14.152 | 0.287                           | 1.705 | 0.338 | -0.181 | 13.72  |
| 0.5          | 72.86    | 0.096                          | 1.304 | 0.68  | -0.052 | 14.132 | 0.23                            | 1.817 | 0.428 | -0.15  | 13.752 |
| 0.6          | 73.07    | 0.078                          | 1.347 | 0.729 | -0.043 | 13.695 | 0.163                           | 1.738 | 0.544 | -0.105 | 13.587 |
| 0.8          | 73.29    | 0.056                          | 1.409 | 0.802 | -0.033 | 13.709 | 0.126                           | 1.849 | 0.633 | -0.084 | 13.581 |
| 1            | 73.39    | 0.041                          | 1.441 | 0.857 | -0.028 | 13.35  | 0.104                           | 1.883 | 0.697 | -0.076 | 13.529 |
| 1.5          | 72.65    | 0.012                          | 1.43  | 0.983 | -0.02  | 14.263 | 0.057                           | 1.799 | 0.847 | -0.056 | 13.828 |
| 2            | 70.29    | 0.005                          | 1.452 | 1.023 | -0.02  | 13.311 | 0.063                           | 1.807 | 0.85  | -0.069 | 13.415 |
| 3            | 64.82    | 0.018                          | 1.481 | 1.015 | -0.043 | 13.274 | 0.092                           | 1.774 | 0.802 | -0.11  | 13.531 |
| 4            | 61.11    | 0.035                          | 1.489 | 0.98  | -0.059 | 13.74  | 0.107                           | 1.708 | 0.78  | -0.124 | 13.862 |
| 5            | 58.82    | 0.068                          | 1.59  | 0.895 | -0.088 | 13.965 | 0.142                           | 1.804 | 0.707 | -0.157 | 14.121 |
| 6            | 57.44    | 0.076                          | 1.644 | 0.886 | -0.092 | 14.188 | 0.144                           | 1.81  | 0.712 | -0.157 | 14.272 |
| 8            | 55.81    | 0.073                          | 1.795 | 0.926 | -0.092 | 14.177 | 0.126                           | 1.837 | 0.782 | -0.142 | 14.29  |
| 10           | 54.91    | 0.039                          | 1.8   | 1.079 | -0.062 | 14.094 | 0.086                           | 1.753 | 0.925 | -0.109 | 14.126 |
| 15           | 53.99    | 0.015                          | 1.937 | 1.271 | -0.047 | 13.775 | 0.054                           | 1.749 | 1.122 | -0.086 | 13.902 |

**Table S13.** Equivalent atomic numbers, G–P fitting parameters for EBF and EABF, respectively, for glass S5.

| Energy (MeV) | $Z_{eq}$ | G–P fitting parameters for EBF |       |       |        |        | G–P fitting parameters for EABF |       |       |        |        |
|--------------|----------|--------------------------------|-------|-------|--------|--------|---------------------------------|-------|-------|--------|--------|
|              |          | a                              | b     | c     | d      | $X_k$  | a                               | b     | c     | d      | $X_k$  |
| 0.015        | 32.9     | -0.13                          | 1.004 | 1.473 | 0.129  | 11.65  | -0.136                          | 1.004 | 1.478 | 0.1379 | 12.243 |
| 0.02         | 40.49    | 0.096                          | 2.403 | 1.837 | -0.116 | 13.051 | 0.062                           | 1.205 | 1.866 | -0.058 | 17.595 |
| 0.03         | 40.74    | 0.117                          | 3.427 | 1.032 | -0.204 | 30.487 | 0.118                           | 1.473 | 1.04  | -0.124 | 26.636 |
| 0.04         | 41.07    | 0.097                          | 3.765 | 0.322 | -0.036 | 22.829 | 0.112                           | 1.462 | 0.324 | -0.06  | 23.355 |
| 0.05         | 41.38    | -0.29                          | 3.027 | 0.051 | 0.048  | 11.997 | -0.138                          | 1.37  | 0.064 | 0.1112 | 8.4851 |
| 0.06         | 41.67    | 1.084                          | 2.38  | 0.012 | -0.148 | 17.434 | 0.787                           | 1.323 | 0.03  | -0.19  | 14.902 |
| 0.08         | 42.17    | 0.768                          | 1.664 | 0.033 | -0.254 | 14.425 | 0.577                           | 1.302 | 0.08  | -0.228 | 14.045 |
| 0.1          | 71.63    | 0.123                          | 1.731 | 0.726 | -0.092 | 16.654 | 0.129                           | 1.757 | 0.702 | -0.095 | 16.793 |
| 0.15         | 72.82    | 0.366                          | 1.247 | 0.145 | -0.104 | 14.977 | 0.353                           | 1.58  | 0.102 | -0.051 | 23.127 |
| 0.2          | 73.48    | 0.341                          | 1.155 | 0.255 | -0.193 | 13.704 | 0.624                           | 1.519 | 0.077 | -0.3   | 13.941 |
| 0.3          | 74.2     | 0.169                          | 1.169 | 0.485 | -0.082 | 13.617 | 0.398                           | 1.558 | 0.201 | -0.219 | 13.309 |
| 0.4          | 74.6     | 0.124                          | 1.23  | 0.598 | -0.065 | 14.144 | 0.298                           | 1.671 | 0.321 | -0.187 | 13.701 |
| 0.5          | 74.86    | 0.099                          | 1.286 | 0.668 | -0.053 | 14.138 | 0.24                            | 1.78  | 0.411 | -0.156 | 13.732 |
| 0.6          | 75.02    | 0.081                          | 1.329 | 0.717 | -0.044 | 13.702 | 0.168                           | 1.694 | 0.532 | -0.106 | 13.576 |
| 0.8          | 75.22    | 0.058                          | 1.39  | 0.791 | -0.033 | 13.707 | 0.131                           | 1.81  | 0.618 | -0.086 | 13.572 |
| 1            | 75.29    | 0.044                          | 1.424 | 0.846 | -0.028 | 13.396 | 0.108                           | 1.85  | 0.682 | -0.077 | 13.527 |
| 1.5          | 74.72    | 0.014                          | 1.416 | 0.974 | -0.021 | 14.333 | 0.061                           | 1.778 | 0.836 | -0.057 | 13.863 |
| 2            | 72.83    | 0.006                          | 1.435 | 1.015 | -0.02  | 13.373 | 0.064                           | 1.777 | 0.845 | -0.069 | 13.432 |
| 3            | 68.39    | 0.016                          | 1.451 | 1.018 | -0.041 | 13.333 | 0.09                            | 1.727 | 0.806 | -0.107 | 13.535 |
| 4            | 65.18    | 0.031                          | 1.453 | 0.993 | -0.055 | 13.737 | 0.103                           | 1.636 | 0.79  | -0.121 | 13.867 |
| 5            | 63.15    | 0.064                          | 1.542 | 0.912 | -0.084 | 13.978 | 0.136                           | 1.689 | 0.724 | -0.151 | 14.145 |
| 6            | 61.9     | 0.071                          | 1.588 | 0.906 | -0.089 | 14.169 | 0.138                           | 1.686 | 0.731 | -0.151 | 14.291 |
| 8            | 60.4     | 0.069                          | 1.786 | 0.948 | -0.088 | 14.155 | 0.124                           | 1.777 | 0.796 | -0.141 | 14.28  |
| 10           | 59.57    | 0.034                          | 1.87  | 1.108 | -0.058 | 14.022 | 0.083                           | 1.772 | 0.948 | -0.107 | 14.09  |
| 15           | 58.71    | 0.007                          | 2.134 | 1.327 | -0.039 | 13.688 | 0.039                           | 2.036 | 1.193 | -0.073 | 13.747 |

**Table S14.** Equivalent atomic numbers, G–P fitting parameters for EBF and EABF, respectively, for glass S6.

| Energy (MeV) | $Z_{eq}$ | G–P fitting parameters for EBF |       |       |        |        | G–P fitting parameters for EABF |       |       |        |        |
|--------------|----------|--------------------------------|-------|-------|--------|--------|---------------------------------|-------|-------|--------|--------|
|              |          | a                              | b     | c     | d      | $X_k$  | a                               | b     | c     | d      | $X_k$  |
| 0.015        | 34.62    | -0.055                         | 1.005 | 1.241 | 0.0795 | 11.853 | -0.066                          | 1.005 | 1.248 | 0.0917 | 12.686 |
| 0.02         | 73.55    | 0.139                          | 1.003 | 0.465 | -0.082 | 24.785 | 0.139                           | 1.003 | 0.465 | -0.081 | 24.676 |
| 0.03         | 42.39    | 0.105                          | 3.603 | 1.133 | -0.208 | 31.016 | 0.103                           | 1.527 | 1.14  | -0.114 | 27.118 |
| 0.04         | 42.57    | 0.089                          | 3.913 | 0.391 | -0.039 | 23.597 | 0.106                           | 1.502 | 0.392 | -0.043 | 22.459 |
| 0.05         | 42.79    | -0.253                         | 3.149 | 0.086 | 0.0245 | 12.477 | -0.108                          | 1.41  | 0.099 | 0.0834 | 9.1944 |
| 0.06         | 43.02    | 0.947                          | 2.482 | 0.036 | -0.135 | 15.791 | 0.678                           | 1.36  | 0.055 | -0.157 | 15.774 |
| 0.08         | 43.46    | 0.776                          | 1.69  | 0.03  | -0.236 | 14.606 | 0.604                           | 1.318 | 0.072 | -0.228 | 14.079 |
| 0.1          | 74.19    | 0.158                          | 1.768 | 0.883 | -0.136 | 16.224 | 0.166                           | 1.794 | 0.848 | -0.137 | 16.254 |
| 0.15         | 75.21    | 0.34                           | 1.277 | 0.178 | -0.075 | 15.431 | 0.311                           | 1.615 | 0.138 | -0.015 | 24.786 |
| 0.2          | 75.73    | 0.365                          | 1.165 | 0.228 | -0.195 | 13.779 | 0.599                           | 1.536 | 0.075 | -0.258 | 14.73  |
| 0.3          | 76.31    | 0.178                          | 1.163 | 0.468 | -0.087 | 13.581 | 0.42                            | 1.55  | 0.185 | -0.228 | 13.301 |
| 0.4          | 76.63    | 0.128                          | 1.218 | 0.588 | -0.067 | 14.157 | 0.312                           | 1.649 | 0.304 | -0.195 | 13.673 |
| 0.5          | 76.83    | 0.102                          | 1.271 | 0.658 | -0.054 | 14.156 | 0.25                            | 1.749 | 0.394 | -0.161 | 13.714 |
| 0.6          | 76.97    | 0.083                          | 1.312 | 0.708 | -0.044 | 13.725 | 0.172                           | 1.654 | 0.521 | -0.107 | 13.568 |
| 0.8          | 77.12    | 0.06                           | 1.373 | 0.782 | -0.033 | 13.702 | 0.136                           | 1.774 | 0.604 | -0.088 | 13.56  |
| 1            | 77.18    | 0.046                          | 1.408 | 0.836 | -0.028 | 13.475 | 0.113                           | 1.818 | 0.669 | -0.079 | 13.522 |
| 1.5          | 76.75    | 0.015                          | 1.403 | 0.965 | -0.021 | 14.424 | 0.065                           | 1.761 | 0.821 | -0.059 | 13.9   |
| 2            | 75.34    | 0.008                          | 1.42  | 1.006 | -0.02  | 13.419 | 0.068                           | 1.758 | 0.832 | -0.071 | 13.45  |
| 3            | 71.95    | 0.015                          | 1.422 | 1.021 | -0.04  | 13.389 | 0.088                           | 1.683 | 0.811 | -0.105 | 13.538 |
| 4            | 69.33    | 0.025                          | 1.409 | 1.015 | -0.05  | 13.729 | 0.102                           | 1.59  | 0.795 | -0.119 | 13.859 |
| 5            | 67.65    | 0.058                          | 1.48  | 0.934 | -0.079 | 13.965 | 0.131                           | 1.614 | 0.738 | -0.147 | 14.146 |
| 6            | 66.58    | 0.065                          | 1.518 | 0.928 | -0.084 | 14.209 | 0.134                           | 1.591 | 0.745 | -0.148 | 14.297 |
| 8            | 65.28    | 0.066                          | 1.69  | 0.969 | -0.086 | 14.133 | 0.12                            | 1.625 | 0.812 | -0.138 | 14.284 |
| 10           | 64.55    | 0.033                          | 1.774 | 1.128 | -0.059 | 13.968 | 0.078                           | 1.577 | 0.975 | -0.101 | 14.144 |
| 15           | 63.76    | 0.005                          | 2.006 | 1.357 | -0.037 | 13.709 | 0.009                           | 2.174 | 1.311 | -0.041 | 13.683 |



**Table S15.** Effective removal cross-sections for fast neutrons,  $\Sigma_R$  (cm<sup>-1</sup>), for all C1–C6 glasses.

| Glass code | Element | $\Sigma_R/\rho$ (cm <sup>2</sup> /g) | Fraction by weight % | Partial density (g/cm <sup>3</sup> ) | $\Sigma_R$ (cm <sup>-1</sup> ) |
|------------|---------|--------------------------------------|----------------------|--------------------------------------|--------------------------------|
| C1         | O       | 0.0405                               | 0.4648               | 1.4428                               | 0.0584                         |
|            | Ca      | 0.0243                               | 0.1164               | 0.3614                               | 0.0088                         |
|            | B       | 0.0575                               | 0.1759               | 0.5460                               | 0.0314                         |
|            | Bi      | 0.0103                               | 0.2429               | 0.7538                               | 0.0078                         |
|            | Total   |                                      | <b>0.1064</b>        |                                      |                                |
| C2         | O       | 0.0405                               | 0.3650               | 1.4105                               | 0.0571                         |
|            | Ca      | 0.0243                               | 0.1143               | 0.4417                               | 0.0107                         |
|            | B       | 0.0575                               | 0.1233               | 0.4765                               | 0.0274                         |
|            | Bi      | 0.0103                               | 0.3973               | 1.5353                               | 0.0158                         |
|            | Total   |                                      | <b>0.1110</b>        |                                      |                                |
| C3         | O       | 0.0405                               | 0.2846               | 1.3711                               | 0.0555                         |
|            | Ca      | 0.0243                               | 0.0548               | 0.2642                               | 0.0064                         |
|            | B       | 0.0575                               | 0.0887               | 0.4276                               | 0.0246                         |
|            | Bi      | 0.0103                               | 0.5718               | 2.7552                               | 0.0284                         |
|            | Total   |                                      | <b>0.1149</b>        |                                      |                                |
| C4         | O       | 0.0405                               | 0.2160               | 1.2529                               | 0.0507                         |
|            | Ca      | 0.0243                               | 0.0541               | 0.3138                               | 0.0076                         |
|            | B       | 0.0575                               | 0.0526               | 0.3048                               | 0.0175                         |
|            | Bi      | 0.0103                               | 0.6773               | 3.9275                               | 0.0405                         |
|            | Total   |                                      | <b>0.1163</b>        |                                      |                                |
| C5         | O       | 0.0405                               | 0.2094               | 1.2676                               | 0.0513                         |
|            | Ca      | 0.0243                               | 0.0291               | 0.1764                               | 0.0043                         |
|            | B       | 0.0575                               | 0.0524               | 0.3172                               | 0.0182                         |
|            | Bi      | 0.0103                               | 0.7091               | 4.2927                               | 0.0442                         |
|            | Total   |                                      | <b>0.1180</b>        |                                      |                                |
| C6         | O       | 0.0405                               | 0.168139             | 1.1758                               | 0.0476                         |
|            | Ca      | 0.0243                               | 0.015042             | 0.1052                               | 0.0026                         |
|            | B       | 0.0575                               | 0.032461             | 0.2270                               | 0.0131                         |
|            | Bi      | 0.0103                               | 0.784356             | 5.4850                               | 0.0565                         |
|            | Total   |                                      | <b>0.1198</b>        |                                      |                                |

**Table S16.** Effective removal cross-sections for fast neutrons,  $\Sigma_R$  (cm<sup>-1</sup>), for all S1–S6 glasses.

| Glass code | Element      | $\Sigma_R/\rho$ (cm <sup>2</sup> /g) | Fraction by weight % | Partial density (g/cm <sup>3</sup> ) | $\Sigma_R$ (cm <sup>-1</sup> ) |
|------------|--------------|--------------------------------------|----------------------|--------------------------------------|--------------------------------|
| S1         | O            | 0.0405                               | 0.3854               | 1.3766                               | 0.0558                         |
|            | Sr           | 0.0160                               | 0.2638               | 0.9424                               | 0.0151                         |
|            | B            | 0.0575                               | 0.1411               | 0.5038                               | 0.0290                         |
|            | Bi           | 0.0103                               | 0.2097               | 0.7492                               | 0.0077                         |
|            | <b>Total</b> |                                      | <b>0.1076</b>        |                                      |                                |
| S2         | O            | 0.0405                               | 0.3220               | 1.4228                               | 0.0576                         |
|            | Sr           | 0.0160                               | 0.0980               | 0.4427                               | 0.0071                         |
|            | B            | 0.0575                               | 0.1128               | 0.5098                               | 0.0293                         |
|            | Bi           | 0.0103                               | 0.4673               | 2.1116                               | 0.0217                         |
|            | <b>Total</b> |                                      | <b>0.1157</b>        |                                      |                                |
| S3         | O            | 0.0405                               | 0.2603               | 1.3900                               | 0.0563                         |
|            | Sr           | 0.0160                               | 0.0509               | 0.2617                               | 0.0042                         |
|            | B            | 0.0575                               | 0.0817               | 0.4197                               | 0.0241                         |
|            | Bi           | 0.0103                               | 0.6071               | 3.1207                               | 0.0321                         |
|            | <b>Total</b> |                                      | <b>0.1167</b>        |                                      |                                |
| S4         | O            | 0.0405                               | 0.2116               | 1.2752                               | 0.0516                         |
|            | Sr           | 0.0160                               | 0.0414               | 0.2494                               | 0.0040                         |
|            | B            | 0.0575                               | 0.0562               | 0.3385                               | 0.0195                         |
|            | Bi           | 0.0103                               | 0.6909               | 4.1639                               | 0.0429                         |
|            | <b>Total</b> |                                      | <b>0.1180</b>        |                                      |                                |
| S5         | O            | 0.0405                               | 0.1782               | 1.1898                               | 0.0482                         |
|            | Sr           | 0.0160                               | 0.0349               | 0.2327                               | 0.0037                         |
|            | B            | 0.0575                               | 0.0387               | 0.2584                               | 0.0149                         |
|            | Bi           | 0.0103                               | 0.7482               | 4.9951                               | 0.0514                         |
|            | <b>Total</b> |                                      | <b>0.1182</b>        |                                      |                                |
| S6         | O            | 0.0405                               | 0.1441               | 1.0939                               | 0.0443                         |
|            | Sr           | 0.0160                               | 0.0282               | 0.2140                               | 0.0034                         |
|            | B            | 0.0575                               | 0.0209               | 0.1584                               | 0.0091                         |
|            | Bi           | 0.0103                               | 0.8068               | 6.1237                               | 0.0631                         |
|            | <b>Total</b> |                                      | <b>0.1199</b>        |                                      |                                |

**Table S17.** Coherent scattering cross-section ( $\sigma_{cs}$ ), incoherent scattering cross-section ( $\sigma_{ics}$ ), absorption cross-section ( $\sigma_A$ ), and total cross-section ( $\sigma_T$ ) of all (i) C1–C6 and (ii) S1–S6 glasses for thermal neutrons attenuation. All derived vlaues are in  $\text{cm}^{-1}$  units.

| (i) C1–C6 glasses  |               |                |             |             |
|--------------------|---------------|----------------|-------------|-------------|
| Glass code         | $\sigma_{cs}$ | $\sigma_{ics}$ | $\sigma_A$  | $\sigma_T$  |
| C1                 | 0.372320836   | 0.052014595    | 23.31988889 | 23.74422432 |
| C2                 | 0.377438108   | 0.045522246    | 20.3560067  | 20.77896705 |
| C3                 | 0.386244416   | 0.040783038    | 18.26411142 | 18.69113887 |
| C4                 | 0.361844198   | 0.028104991    | 12.52273588 | 12.91268507 |
| C5                 | 0.384875769   | 0.03030552     | 13.55084797 | 13.96602926 |
| C6                 | 0.380909001   | 0.021735561    | 9.69630217  | 10.09894673 |
| (ii) S1–S6 glasses |               |                |             |             |
| Glass code         | $\sigma_{cs}$ | $\sigma_{ics}$ | $\sigma_A$  | $\sigma_T$  |
| S1                 | 0.378341783   | 0.048143765    | 21.52756033 | 21.95404588 |
| S2                 | 0.406639459   | 0.048534109    | 21.77641243 | 22.231586   |
| S3                 | 0.389148279   | 0.039957207    | 17.9294571  | 18.35856259 |
| S4                 | 0.390110323   | 0.032285366    | 14.45984187 | 14.88223756 |
| S5                 | 0.381917834   | 0.024714239    | 11.039053   | 11.44568507 |
| S6                 | 0.375888227   | 0.015263495    | 6.767510604 | 7.158662326 |

**Table S18.** Coherent scattering cross-section ( $\sigma_{cs}$ , barn), incoherent scattering cross-section ( $\sigma_{ics}$ , barn), absorption cross-section ( $\sigma_A$ , barn), and total cross-section ( $\sigma_T$ , barn) of B, Bi, Ca, Sr, and O elements for thermal neutrons.

| Element | $\sigma_{cs}$ | $\sigma_{ics}$ | $\sigma_A$ | $\sigma_T$ |
|---------|---------------|----------------|------------|------------|
| B       | 3.54          | 1.7            | 767        | 772.24     |
| Bi      | 9.148         | 0.0084         | 0.0338     | 9.1902     |
| Ca      | 2.78          | 0.05           | 0.43       | 3.26       |
| Sr      | 6.19          | 0.06           | 1.28       | 7.53       |
| O       | 4.232         | 0.0008         | 0.00019    | 4.23299    |
